# Supplementary material for: Electrophilicity modulated targeted luminescence of MOF-coated cotton composite for dual analyte detection in aqueous medium
Source: Royal Society of Chemistry journal article supplement (doi:10.1039/d3qi00206c), 2023-01-01
Supplement: d3qi00206c1.pdf [file d3qi00206c1.pdf]

**Supplementary Information For:**

**Electrophilicity Modulated Targeted Luminescence of MOF Coated Cotton Composite  
for Dual Analyte Detection in Aqueous Medium**

*Abhijeet Rana and Shyam Biswas\**

Department of Chemistry, Indian Institute of Technology Guwahati, Guwahati, 781039  
Assam, India.

\*To whom correspondence should be addressed. E-mail: sbiswas@iitg.ac.in; Tel: 91-3612583309.

## Materials and Characterization Methods:

All the chemicals were purchased from commercial sources and used without further purification. A Bruker Avance III 600 NMR spectrometer was utilized for recording  $^1\text{H}$  NMR and  $^{13}\text{C}$  NMR spectra at 500 MHz. The mass spectrum (in -ve ESI mode) was measured with a BRUKER AUTOFLEX SPEED high-resolution mass spectrometer. Fourier transform infrared (FT-IR) spectroscopy data were recorded in the region  $400\text{--}4000\text{ cm}^{-1}$  at room temperature with the Perkin Elmer Spectrum Two FT-IR spectrometer. The following indications were used to indicate the corresponding absorption bands: very strong (vs), strong (s), medium (m), weak (w), shoulder (sh) and broad (br). Thermogravimetric analysis (TGA) was carried out with a Perkin Elmer TGA 4000 thermal analyzer in the temperature range of  $30\text{--}700\text{ }^\circ\text{C}$  under  $\text{N}_2$  atmosphere at the rate of  $4\text{ }^\circ\text{C min}^{-1}$ . Powder X-ray diffraction (PXRD) data were collected in transmission mode using a Bruker D2 Phaser X-ray diffractometer (30 kV, 10 mA) using  $\text{Cu-K}\alpha$  ( $\lambda = 1.5406\text{ \AA}$ ) radiation. The specific surface area for  $\text{N}_2$  sorption was calculated on a Quantachrome Autosorb iQMP gas sorption analyzer at  $-196\text{ }^\circ\text{C}$ . FE-SEM images were collected with a Zeiss (Sigma 300) scanning electron microscope. The compound was activated at  $100\text{ }^\circ\text{C}$  for 24 h under a dynamic vacuum. The solid-state UV-Vis spectra were measured using UV-2600 spectrophotometer. Fluorescence emission studies were performed at room temperature using a HORIBA JOBIN YVON Fluoromax-4 spectrofluorometer.

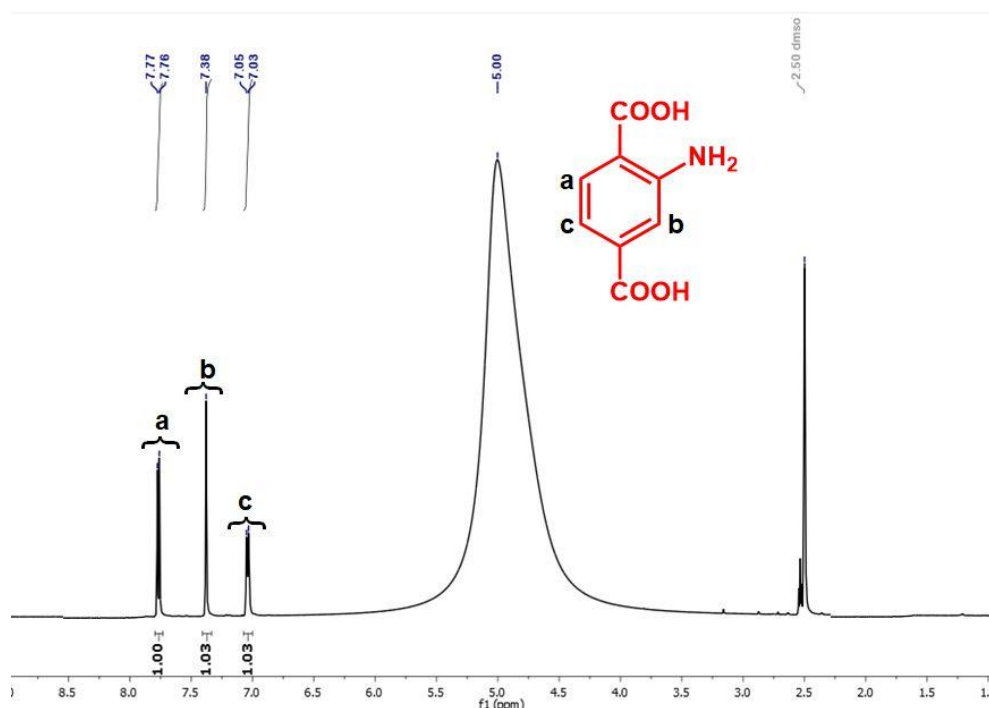

**Figure S1.** Digested  $^1\text{H}$  NMR spectrum of  $\text{Hf-UiO-66-NH}_2$  (digested using 10  $\mu\text{L}$  of 40% HF in 500  $\mu\text{L}$  of  $\text{DMSO-}d_6$  and 20 mg of MOF).

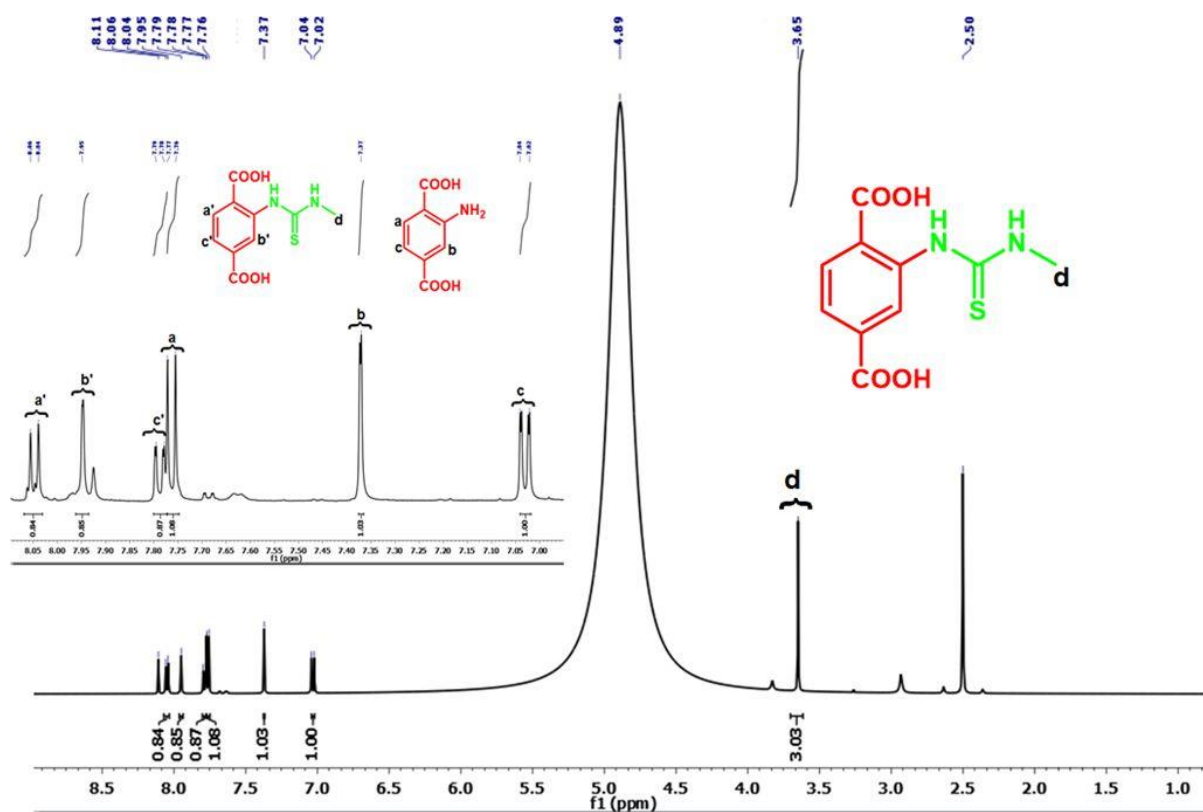

**Figure S2.** Digested  $^1\text{H}$  NMR spectrum of **Hf-UiO-66-NHCSNHCH<sub>3</sub>** MOF (digested using 10  $\mu\text{L}$  of 40% HF in 500  $\mu\text{L}$  of DMSO- $\text{D}_6$  and 20 mg of MOF).

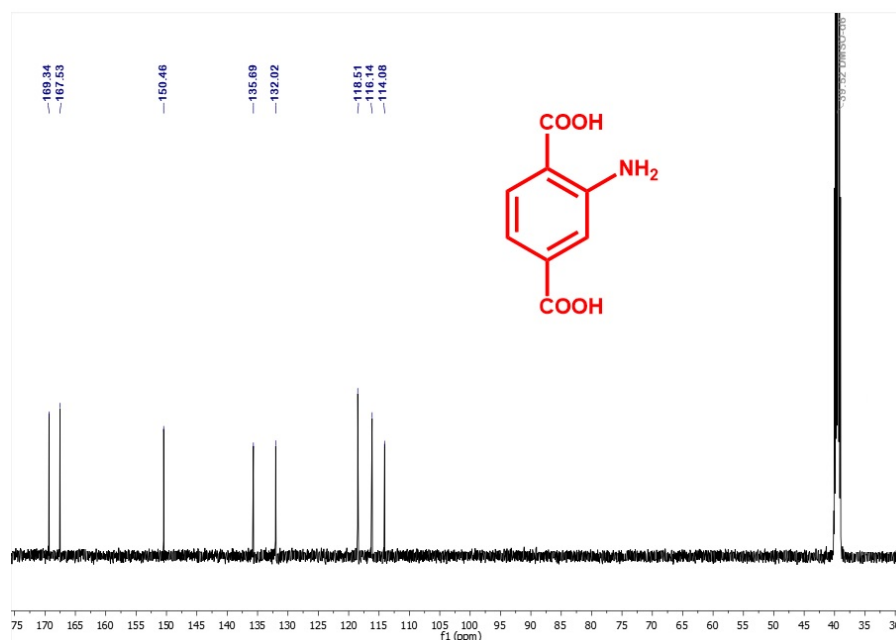

**Figure S3.** Digested  $^{13}\text{C}$  NMR spectrum of **Hf-UiO-66-NH<sub>2</sub>** (digested using 10  $\mu\text{L}$  of 40% HF in 500  $\mu\text{L}$  of DMSO- $\text{D}_6$  and 20 mg of MOF).

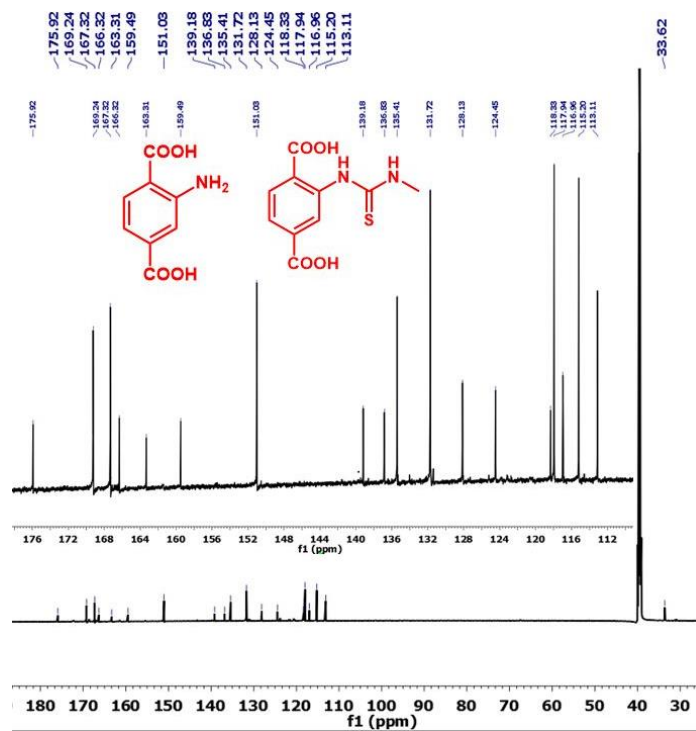

**Figure S4.** Digested  $^{13}\text{C}$  NMR spectrum of **Hf-UiO-66-NHCSNHCH<sub>3</sub>** MOF (digested using 10  $\mu\text{L}$  of 40% HF in 500  $\mu\text{L}$  of DMSO- $\text{D}_6$  and 20 mg of MOF).

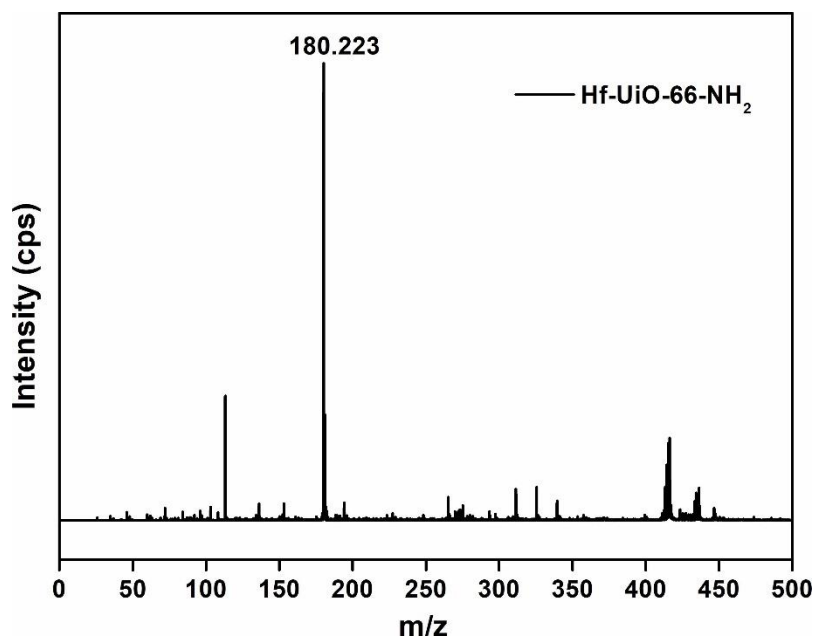

**Figure 5.** Mass spectrum of **Hf-UiO-66-NH<sub>2</sub>** after digestion by HF in methanol/water mixture.

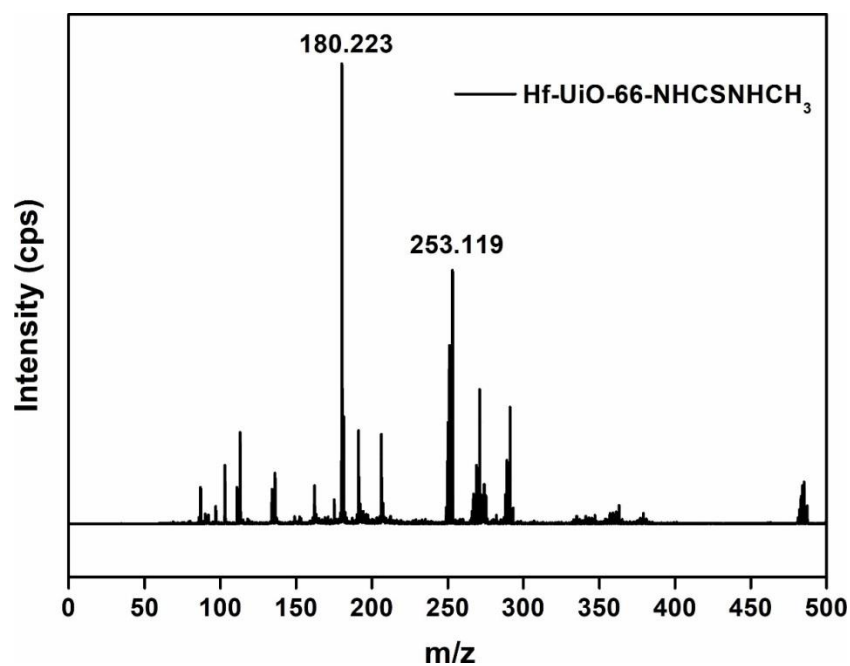

**Figure S6.** Mass spectrum of **Hf-UiO-66-NHCSNHCH<sub>3</sub>** after digestion by HF in methanol/water mixture.

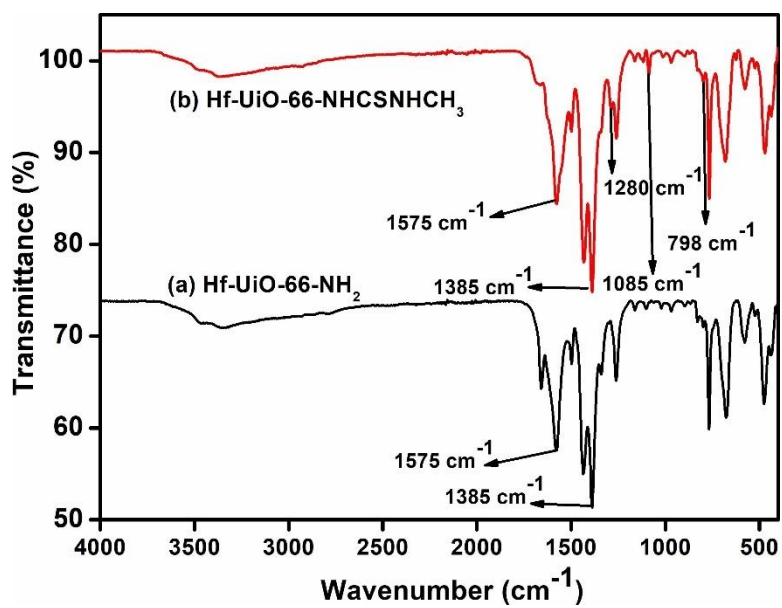

**Figure S7.** AT-IR spectra of **Hf-UiO-66-NH<sub>2</sub>** (black) and **Hf-UiO-66-NHCSNHCH<sub>3</sub>** (red).

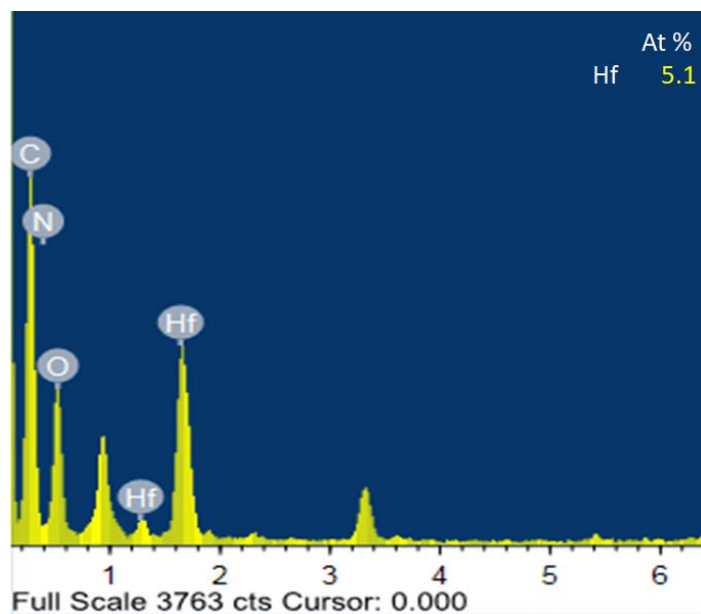

**Figure S8.** TEM-EDX spectrum of **Hf-UiO-66-NH<sub>2</sub>**.

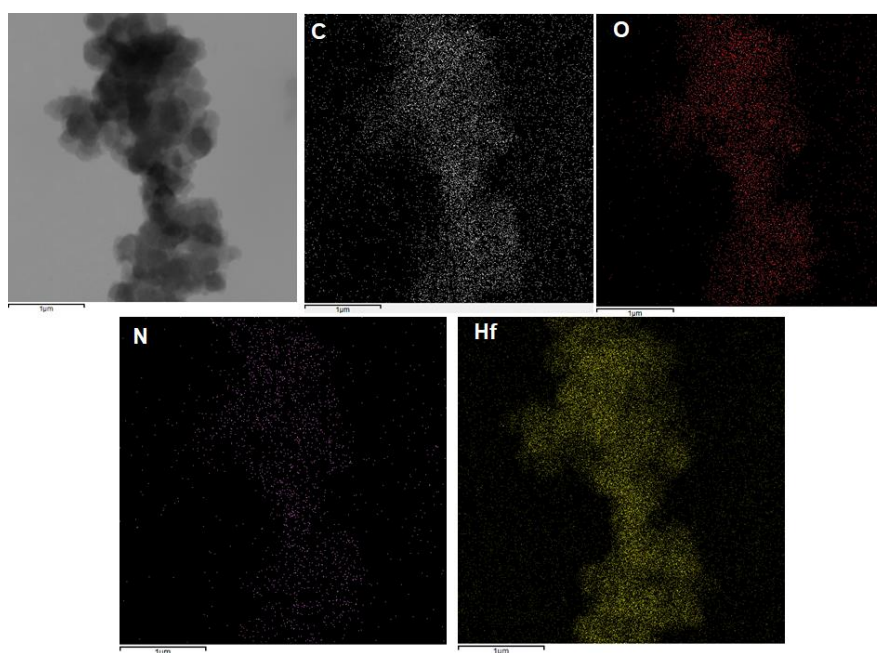

**Figure S9.** TEM-EDX elemental mapping of **Hf-UiO-66-NH<sub>2</sub>**.

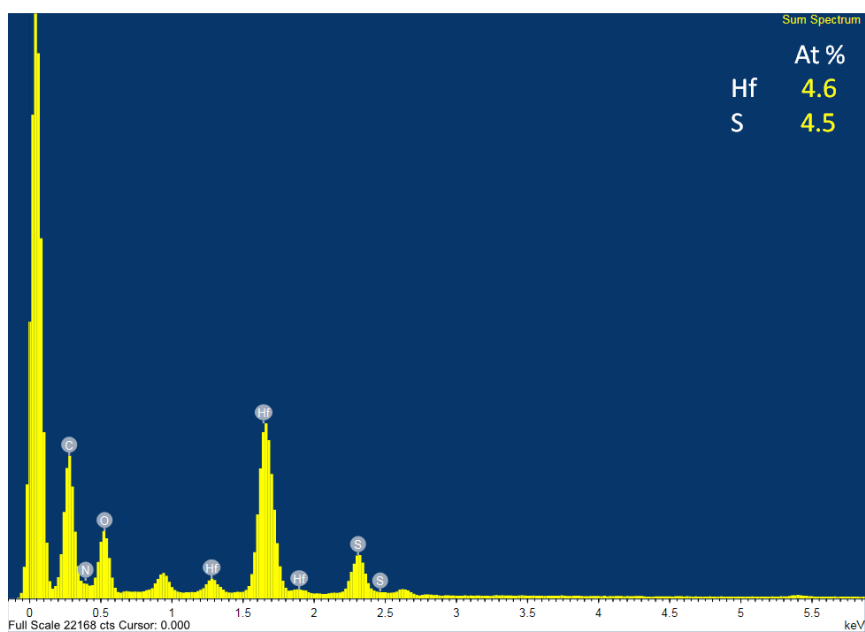

**Figure S10.** TEM-EDX spectrum of **Hf-UiO-66-NHCSNHCH<sub>3</sub>**.

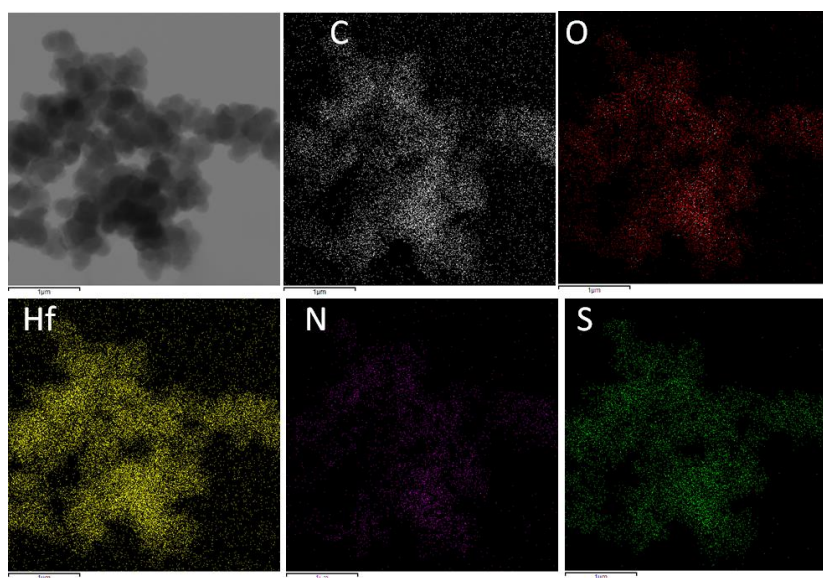

**Figure S11.** TEM-EDX mapping of **Hf-UiO-66-NHCSNHCH<sub>3</sub>**.

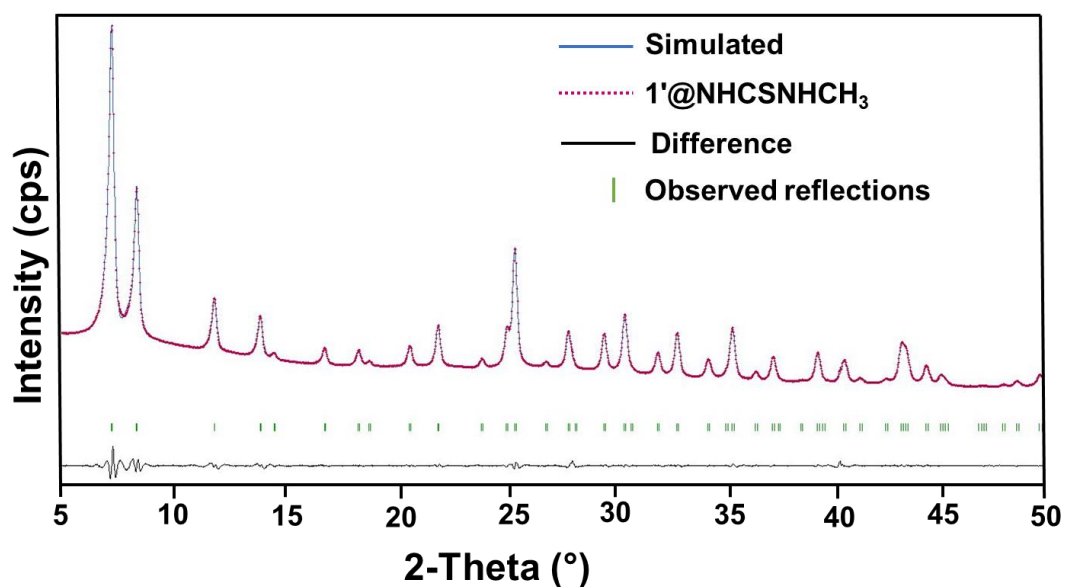

**Figure S12.** Pawley fit plot for the PXRD pattern of **Hf-UiO-66-NHCSNHCH<sub>3</sub>** ( $R_{wp}$  and  $R_p$  are 1.6% and 2.3%, respectively).

**Table S1.** Indexing parameters of simulated UiO-66 and **Hf-UiO-66-NHCSNHCH<sub>3</sub>**.

| Compound name                 | [Hf <sub>6</sub> O <sub>4</sub> (OH) <sub>4</sub> (BDC-NHCSNHCH <sub>3</sub> ) <sub>6</sub> ]·4H <sub>2</sub> O·5DMF<br>( <b>1</b> ) (this work) | UiO-66 (reported) <sup>1</sup> |
|-------------------------------|--------------------------------------------------------------------------------------------------------------------------------------------------|--------------------------------|
| Crystal System                | Cubic                                                                                                                                            | Cubic                          |
| $a = b = c$ (Å)               | 20.743 (5)                                                                                                                                       | 20.700 (2)                     |
| $\alpha = \beta = \gamma$ (°) | 90                                                                                                                                               | 90                             |
| $V$ (Å <sup>3</sup> )         | 8924.6 (35)                                                                                                                                      | 8870.3 (2)                     |
| Radiation                     | Cu K $\alpha$ 1                                                                                                                                  | Cu K $\alpha$ 1                |



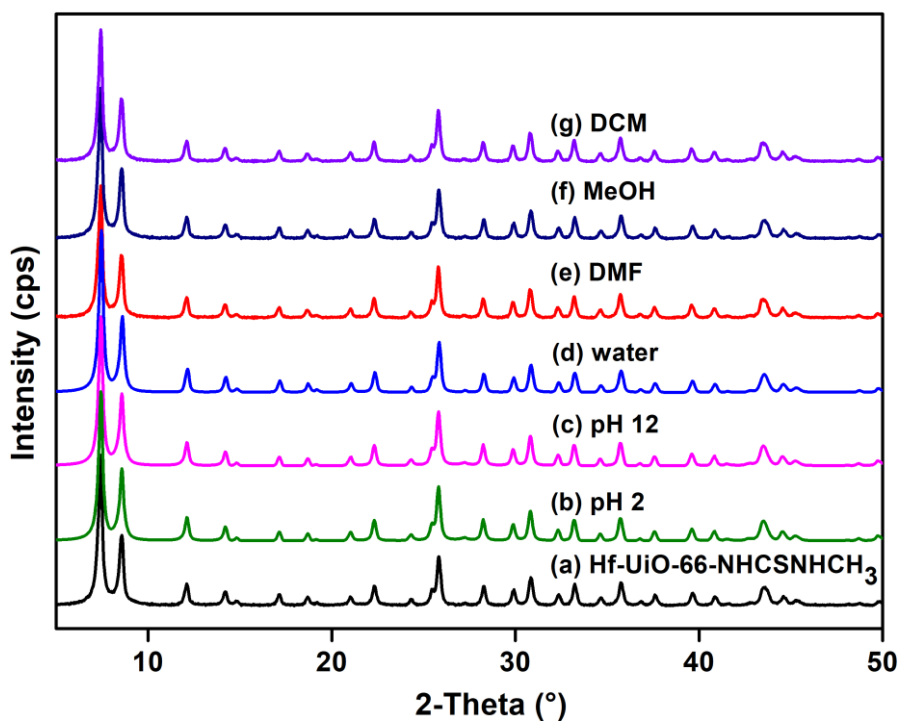

**Figure S13.** PXRD patterns of **Hf-UiO-66-NHCSNHCH<sub>3</sub>** (black) and PXRD pattern of the recovered sample after stirring in (b) pH 2 solution (green), (c) pH 12 solution (pink), (d) water (blue), (e) DMF (red), (f) MeOH (deep blue), (g) DCM (violet).

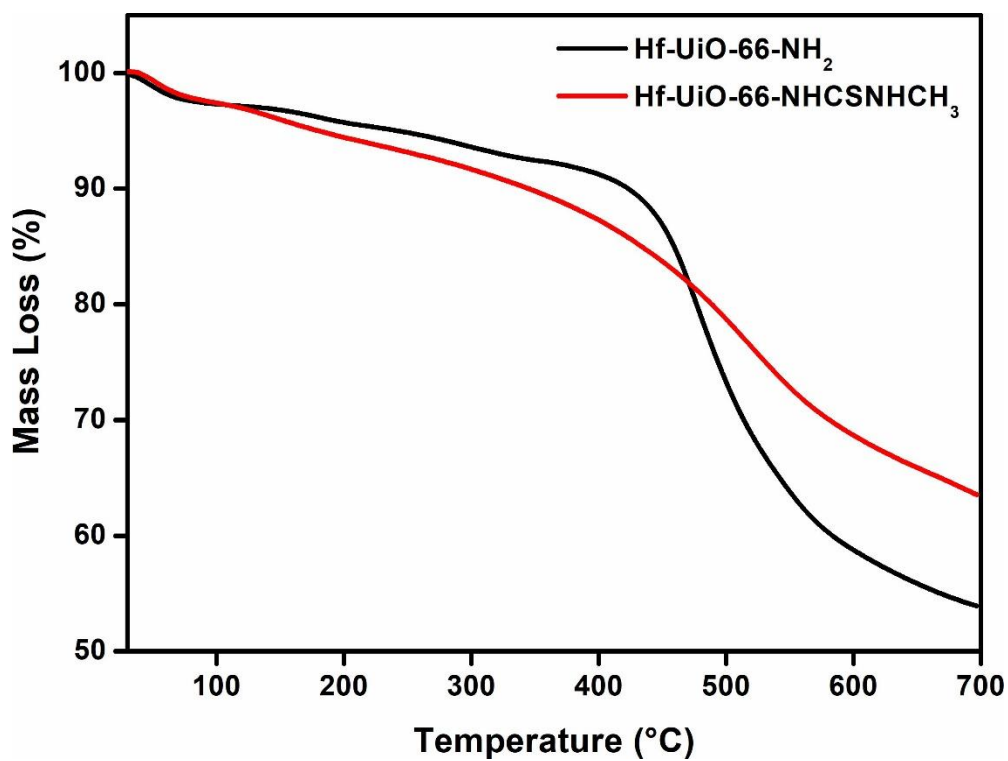

**Figure S14.** TG curves of **Hf-UiO-66-NHCSNHCH<sub>3</sub>** and **Hf-UiO-66-NH<sub>2</sub>** measured at -196 °C.

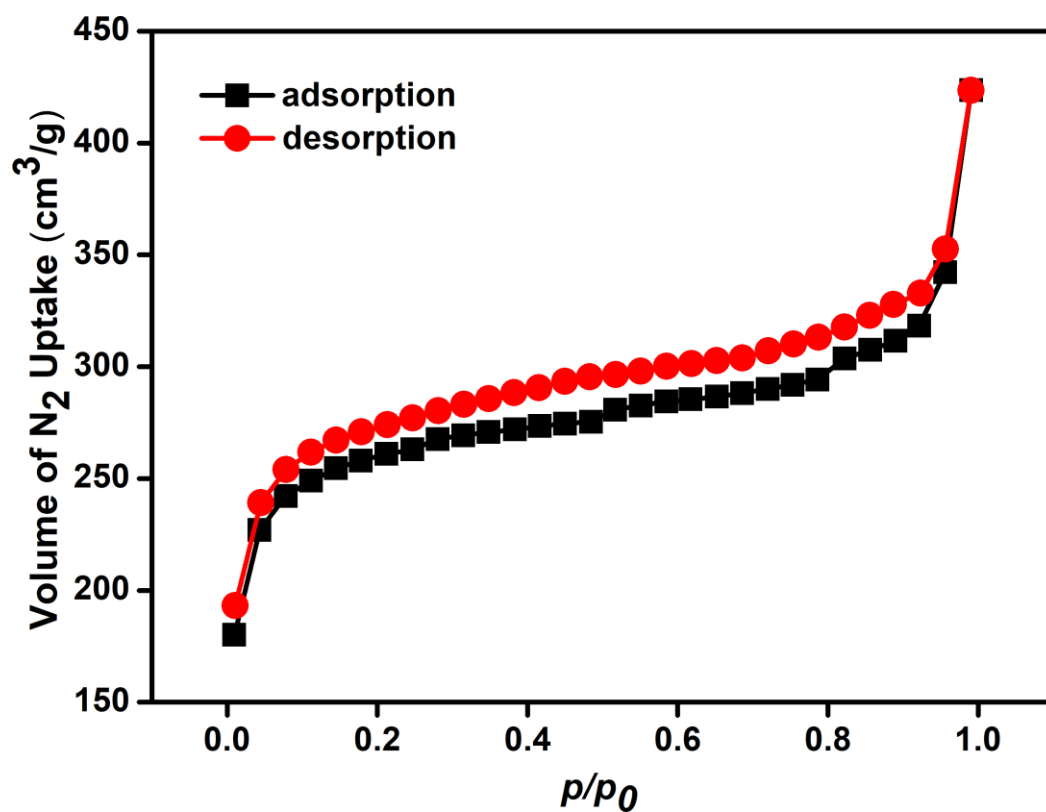

Figure S15. N<sub>2</sub> sorption isotherms of **Hf-UiO-66-NH<sub>2</sub>** measured at -196 °C.

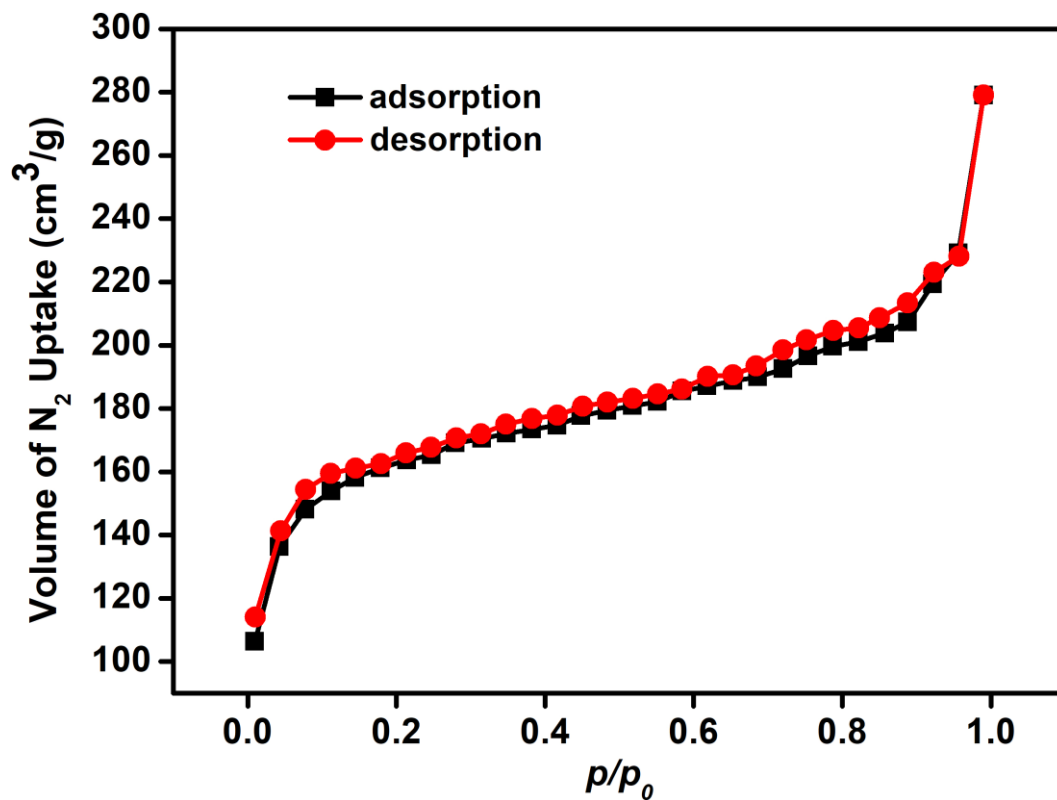

Figure S16. N<sub>2</sub> sorption isotherms of **Hf-UiO-66-NHCSNHCH<sub>3</sub>** measured at -196 °C.

**Table S2.** Intra-day and inter-day precession towards detection of  $\text{Hg}^{2+}$  towards with standard deviation and relative standard deviation.

| Volume of $\text{Hg}^{2+}$ solution added | Intra-Day Fluorescence Emission Intensity (cps) |          |          | Mean ( $\chi$ ) | Standard Deviation ( $\sigma$ ) | Relative Standard Deviation (RSD) |
|-------------------------------------------|-------------------------------------------------|----------|----------|-----------------|---------------------------------|-----------------------------------|
| 0 $\mu\text{L}$                           | 461358.6                                        | 462046.4 | 461947.9 | 461784.3        | 371.9                           | 0.081                             |
| 50 $\mu\text{L}$                          | 214541.7                                        | 215282.9 | 216689.2 | 215504.6        | 1090.8                          | 0.506                             |
| 100 $\mu\text{L}$                         | 124669.3                                        | 125729.4 | 126317.4 | 125572.0        | 835.3                           | 0.665                             |
| 150 $\mu\text{L}$                         | 77811.0                                         | 77153.8  | 77527.4  | 77497.4         | 329.6                           | 0.425                             |
| 200 $\mu\text{L}$                         | 48169.6                                         | 48736.6  | 48896.6  | 48600.9         | 382.0                           | 0.786                             |
| 250 $\mu\text{L}$                         | 33920.7                                         | 33296.7  | 33558.1  | 33591.8         | 313.4                           | 0.933                             |
| 300 $\mu\text{L}$                         | 22522.4                                         | 22841.6  | 22217.5  | 22527.1         | 312.1                           | 1.385                             |
| Volume of $\text{Hg}^{2+}$ solution added | Inter-Day Fluorescence Emission Intensity (cps) |          |          | Mean ( $\chi$ ) | Standard Deviation ( $\sigma$ ) | Relative Standard Deviation (RSD) |
| 0 $\mu\text{L}$                           | 461358.6                                        | 462579.4 | 460047.9 | 461328.6        | 1266.0                          | 0.274                             |
| 50 $\mu\text{L}$                          | 214541.7                                        | 220282.9 | 218689.7 | 217837.9        | 2963.8                          | 1.361                             |
| 100 $\mu\text{L}$                         | 124669.3                                        | 126532.4 | 125212.4 | 125471.4        | 958.2                           | 0.764                             |
| 150 $\mu\text{L}$                         | 77811.0                                         | 78039.8  | 76513.3  | 77454.7         | 823.2                           | 1.061                             |
| 200 $\mu\text{L}$                         | 48169.6                                         | 48254.6  | 49038.6  | 48487.6         | 479.1                           | 0.988                             |
| 250 $\mu\text{L}$                         | 33920.7                                         | 32485.2  | 34061.1  | 33489.0         | 872.1                           | 2.604                             |
| 300 $\mu\text{L}$                         | 22522.4                                         | 21832.6  | 23424.5  | 22593.2         | 798.3                           | 3.533                             |

**Table S3.** Intra-day and inter-day precession towards detection of  $\text{NH}_2\text{-NH}_2$  with standard deviation and relative standard deviation.

| Volume of $\text{NH}_2\text{-NH}_2$ Solution Added | Intra-Day Fluorescence Emission Intensity (cps) |           |           | Mean ( $\chi$ ) | Standard Deviation ( $\sigma$ ) | Relative Standard Deviation (RSD) |
|----------------------------------------------------|-------------------------------------------------|-----------|-----------|-----------------|---------------------------------|-----------------------------------|
| 0 $\mu\text{L}$                                    | 164150.3                                        | 163163.2  | 163084.1  | 163465.9        | 594.1                           | 0.363                             |
| 50 $\mu\text{L}$                                   | 560246.9                                        | 562283.7  | 563234.3  | 561921.6        | 1526.2                          | 0.272                             |
| 100 $\mu\text{L}$                                  | 1406800.8                                       | 1402152.4 | 1408004.7 | 1405652.1       | 3090.1                          | 0.220                             |
| 150 $\mu\text{L}$                                  | 2516240.9                                       | 2513823.7 | 2508612.3 | 2512891.8       | 3898.2                          | 0.155                             |
| 200 $\mu\text{L}$                                  | 3628730.1                                       | 3623210.1 | 3625432.7 | 3625790.9       | 2777.3                          | 0.077                             |
| 250 $\mu\text{L}$                                  | 4351430.3                                       | 4356219.3 | 4359842.8 | 4355830.7       | 4219.8                          | 0.097                             |
| 300 $\mu\text{L}$                                  | 5075660.6                                       | 5084791.6 | 5078214.6 | 5079555.4       | 4711.1                          | 0.093                             |
| Volume of $\text{NH}_2\text{-NH}_2$ Solution Added | Inter-Day Fluorescence Emission Intensity (cps) |           |           | Mean ( $\chi$ ) | Standard Deviation ( $\sigma$ ) | Relative Standard Deviation (RSD) |
| 0 $\mu\text{L}$                                    | 164150.3                                        | 162578.7  | 163897.5  | 163608.8        | 920.4                           | 0.563                             |
| 50 $\mu\text{L}$                                   | 560246.9                                        | 562237.3  | 558721.9  | 560402.04       | 1762.8                          | 0.315                             |
| 100 $\mu\text{L}$                                  | 1406800.8                                       | 1415758.9 | 1413975.5 | 1412178.1       | 4742.2                          | 0.336                             |

|                   |           |           |           |           |        |        |
|-------------------|-----------|-----------|-----------|-----------|--------|--------|
| 150 $\mu\text{L}$ | 2516240.9 | 2508278.4 | 2509391.8 | 2511303.4 | 4311.3 | 0.1717 |
| 200 $\mu\text{L}$ | 3628730.1 | 3609873.7 | 3619854.5 | 3614486.1 | 5033.2 | 0.139  |
| 250 $\mu\text{L}$ | 4351430.3 | 4360429.6 | 4349852.3 | 4353904.0 | 5706.2 | 0.1311 |
| 300 $\mu\text{L}$ | 5075660.6 | 5100874.7 | 4997528.2 | 5058021.0 | 53884  | 1.0653 |

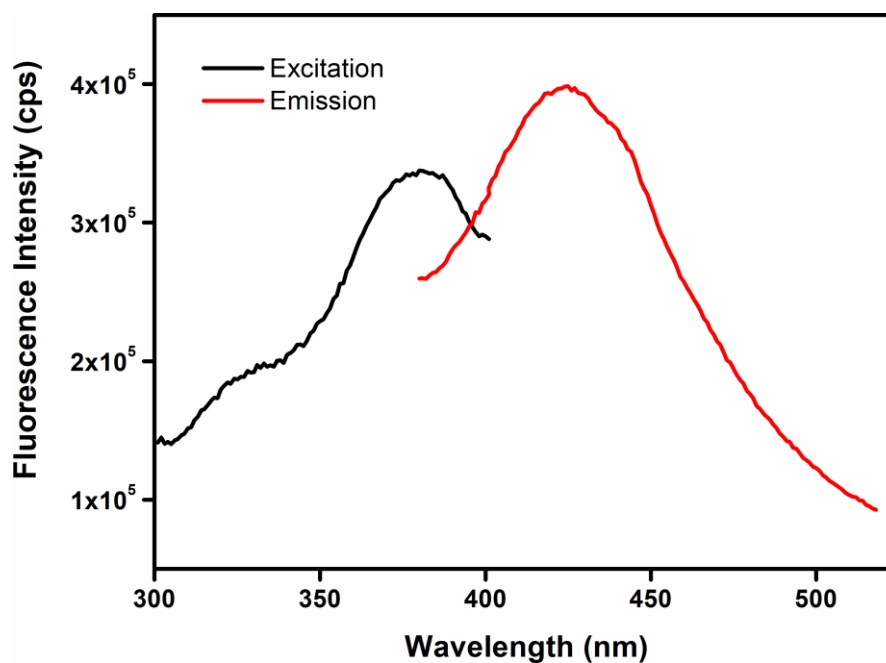

**Figure S17.** Fluorescence excitation and emission spectra of **Hf-UiO-66-NHCSNHCH<sub>3</sub>**.

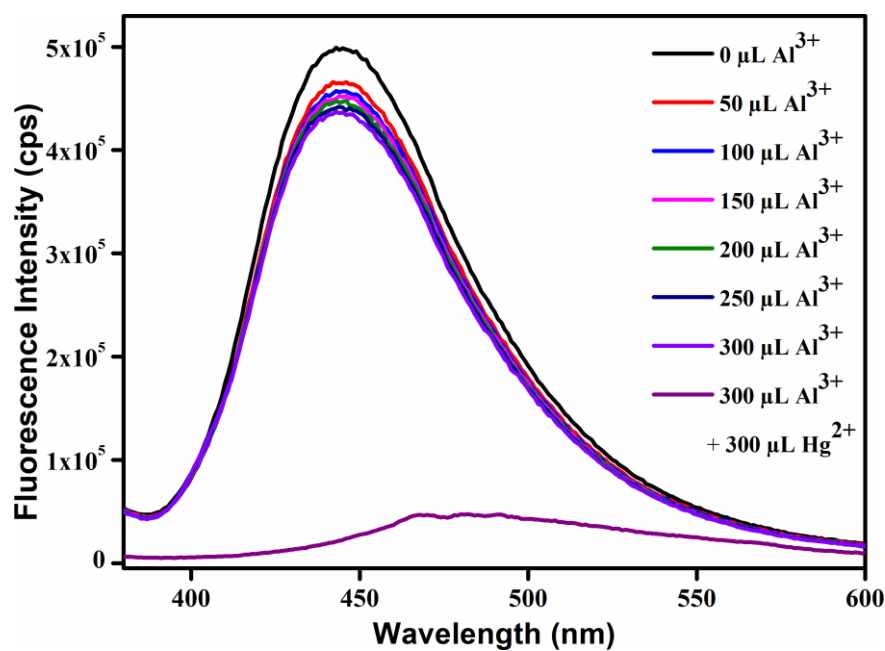

**Figure S18.** Change in fluorescence emission intensity of probe **Hf-UiO-66-NHCSNHCH<sub>3</sub>** with the addition of 300  $\mu\text{L}$  of 10 mM aqueous  $\text{Hg}^{2+}$  solution in the presence of 300  $\mu\text{L}$  of 10 mM aqueous  $\text{Al}^{3+}$  solution.

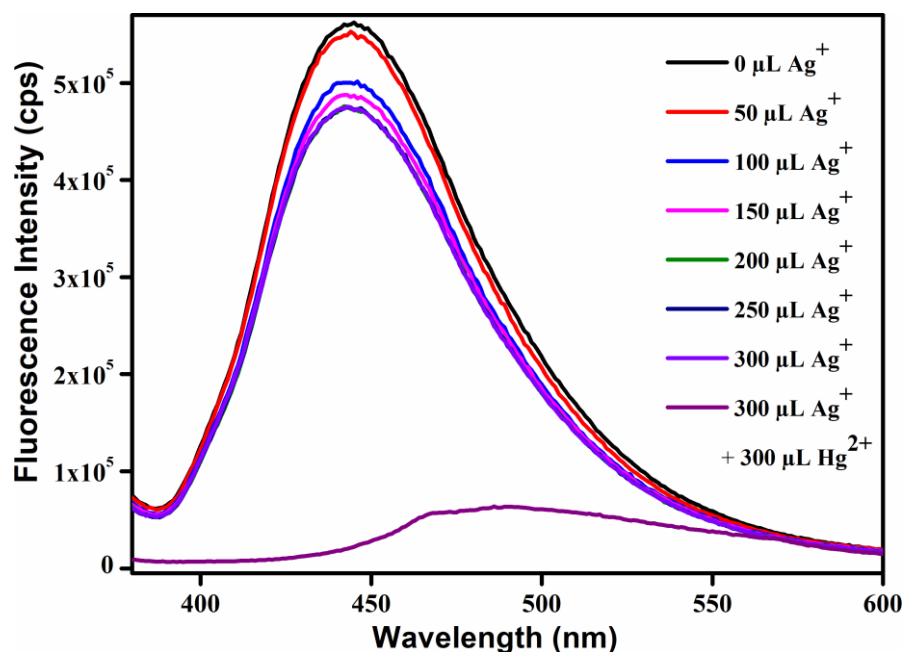

**Figure S19.** Change in fluorescence emission intensity of probe **Hf-UiO-66-NHCSNHCH<sub>3</sub>** with the addition of 300 μL of 10 mM aqueous Hg<sup>2+</sup> solution in the presence of 300 μL of 10 mM aqueous Ag<sup>+</sup> solution.

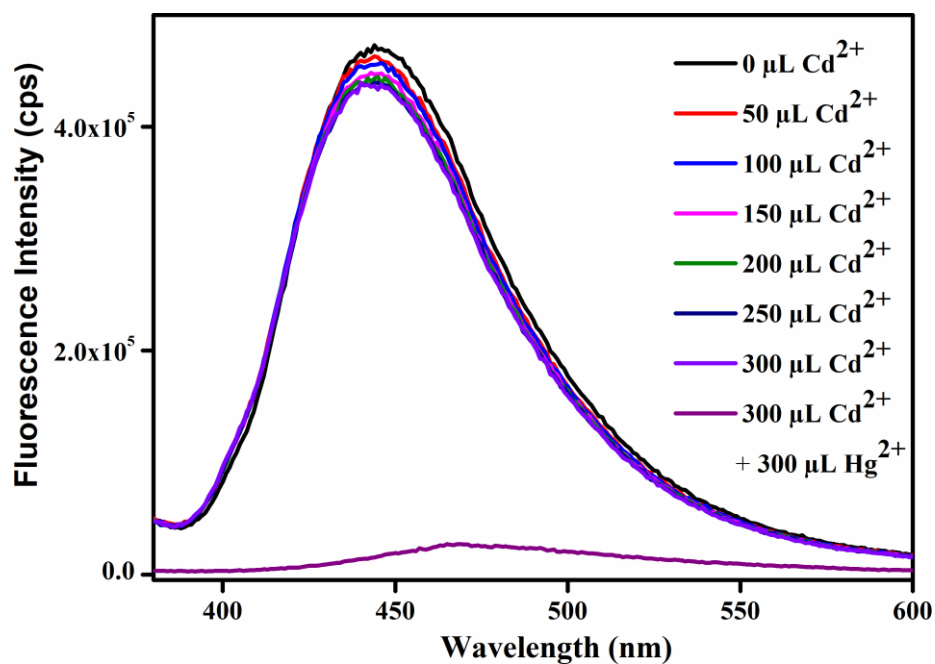

**Figure S20.** Change in fluorescence emission intensity of probe **Hf-UiO-66-NHCSNHCH<sub>3</sub>** with the addition of 300 μL of 10 mM aqueous Hg<sup>2+</sup> solution in the presence of 300 μL of 10 mM aqueous Cd<sup>2+</sup> solution.

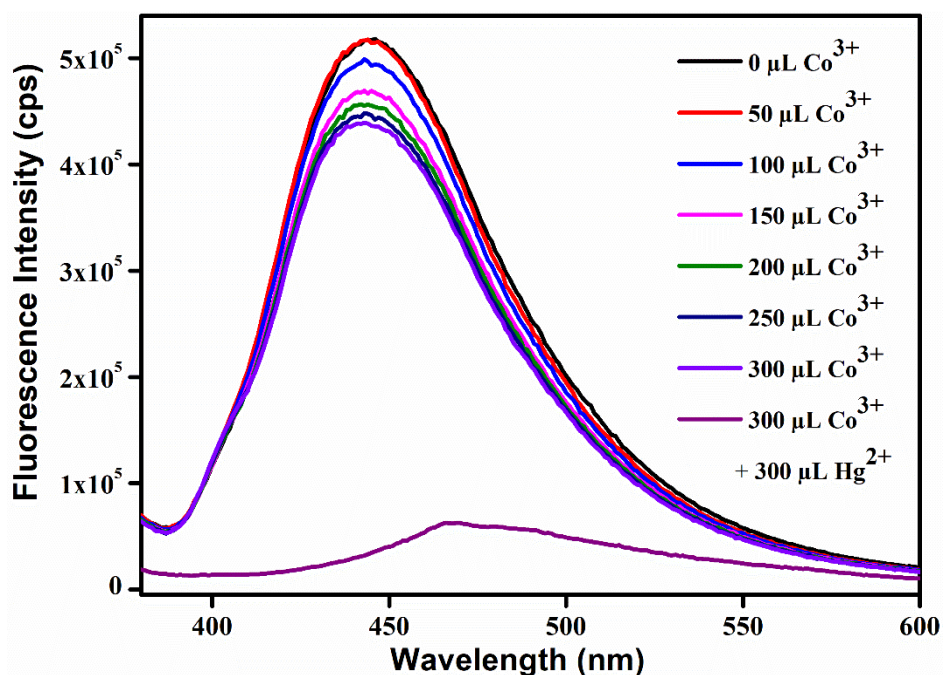

**Figure S21.** Change in fluorescence emission intensity of probe **Hf-UiO-66-NHCSNHCH<sub>3</sub>** with the addition of 300  $\mu\text{L}$  of 10 mM aqueous  $\text{Hg}^{2+}$  solution in the presence of 300  $\mu\text{L}$  of 10 mM aqueous  $\text{Co}^{3+}$  solution.

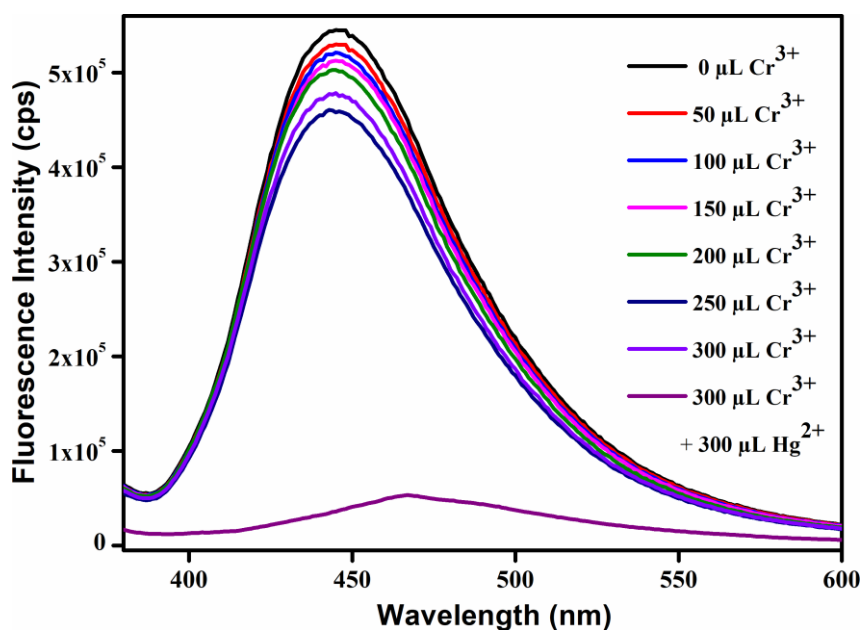

**Figure S22.** Change in fluorescence emission intensity of probe **Hf-UiO-66-NHCSNHCH<sub>3</sub>** with the addition of 300  $\mu\text{L}$  of 10 mM aqueous  $\text{Hg}^{2+}$  solution in the presence of 300  $\mu\text{L}$  of 10 mM aqueous  $\text{Cr}^{3+}$  solution.

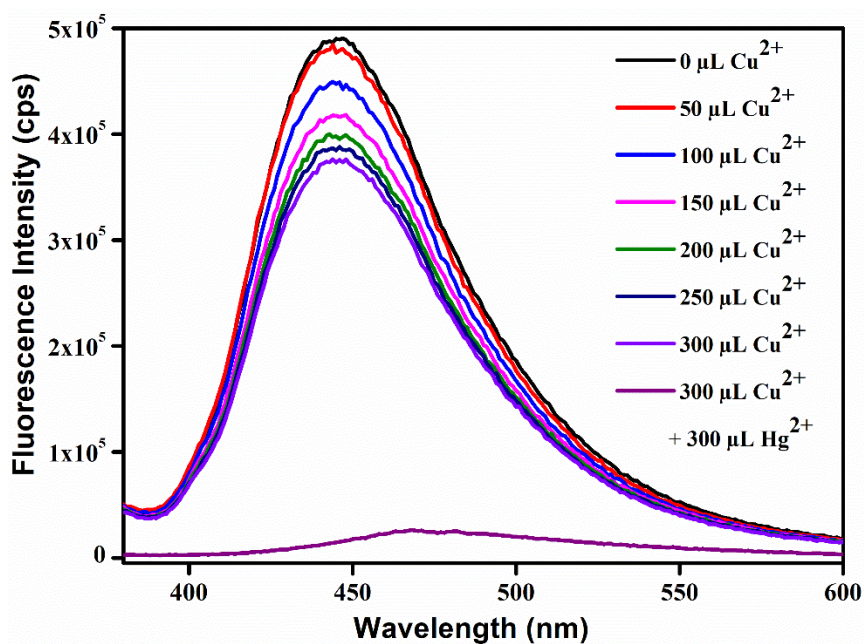

**Figure S23.** Change in fluorescence emission intensity of probe **Hf-UiO-66-NHCSNHCH<sub>3</sub>** with the addition of 300 μL of 10 mM aqueous Hg<sup>2+</sup> solution in the presence of 300 μL of 10 mM aqueous Cu<sup>2+</sup> solution.

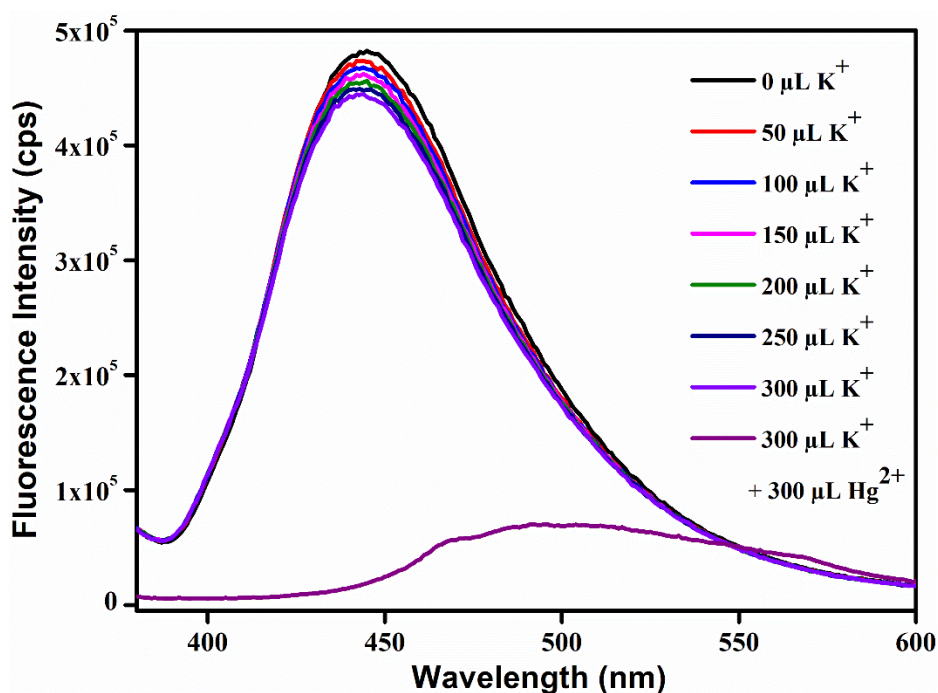

**Figure S24.** Change in fluorescence emission intensity of probe **Hf-UiO-66-NHCSNHCH<sub>3</sub>** with the addition of 300 μL of 10 mM aqueous Hg<sup>2+</sup> solution in the presence of 300 μL of 10 mM aqueous K<sup>+</sup> solution.



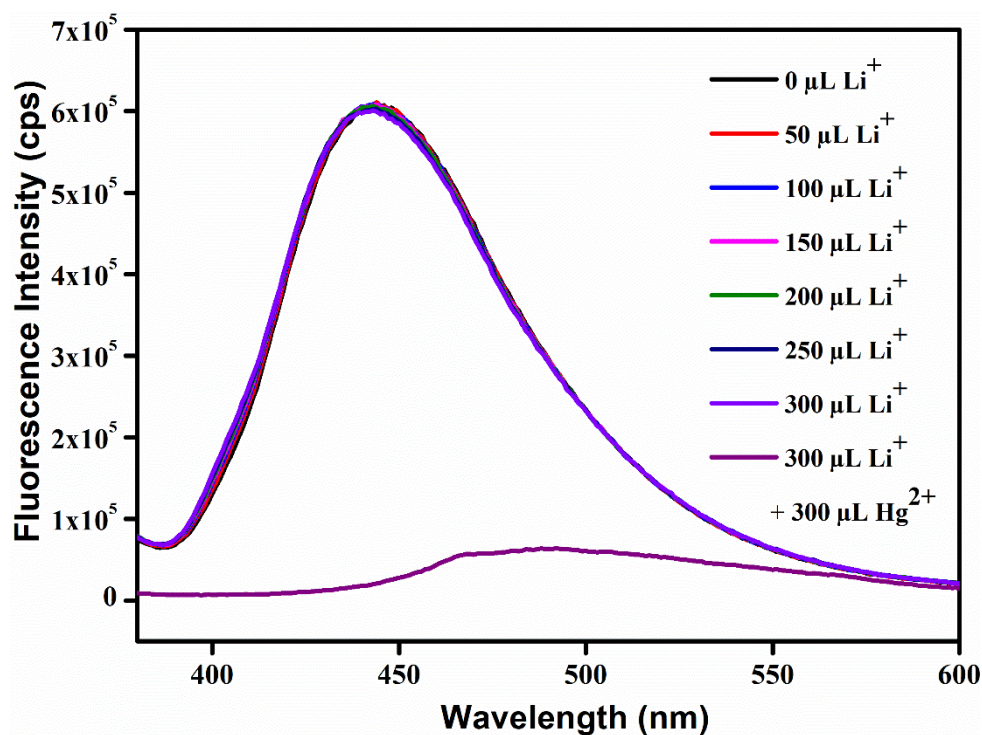

**Figure S25.** Change in fluorescence emission intensity of probe **Hf-UiO-66-NHCSNHCH<sub>3</sub>** with the addition of 300  $\mu\text{L}$  of 10 mM aqueous  $\text{Hg}^{2+}$  solution in the presence of 300  $\mu\text{L}$  of 10 mM aqueous  $\text{Li}^+$  solution.

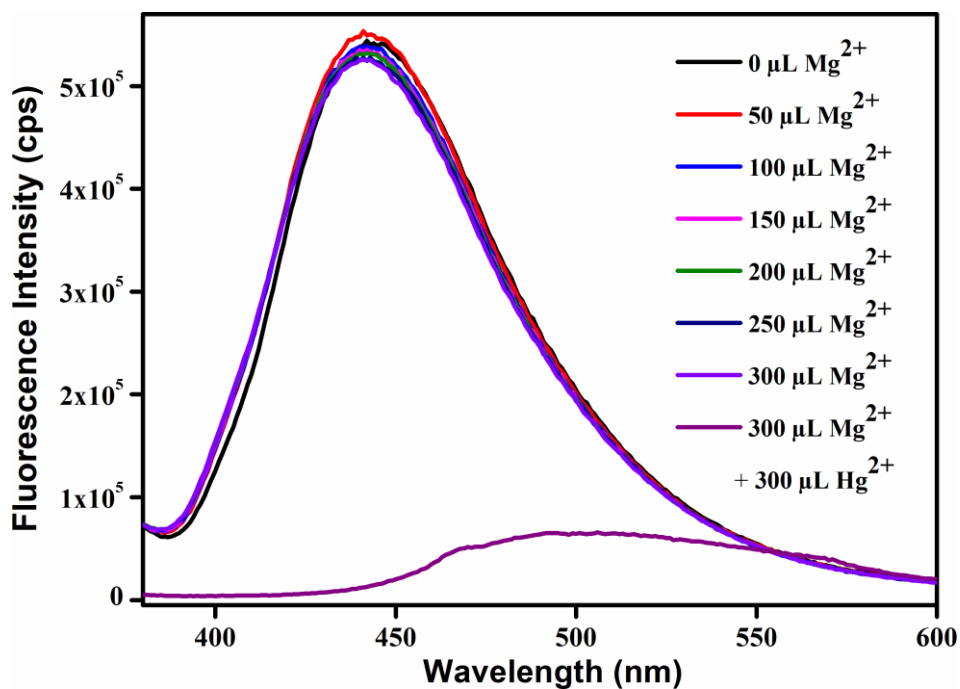

**Figure S26.** Change in fluorescence emission intensity of probe **Hf-UiO-66-NHCSNHCH<sub>3</sub>** with the addition of 300  $\mu\text{L}$  of 10 mM aqueous  $\text{Hg}^{2+}$  solution in the presence of 300  $\mu\text{L}$  of 10 mM aqueous  $\text{Mg}^{2+}$  solution.



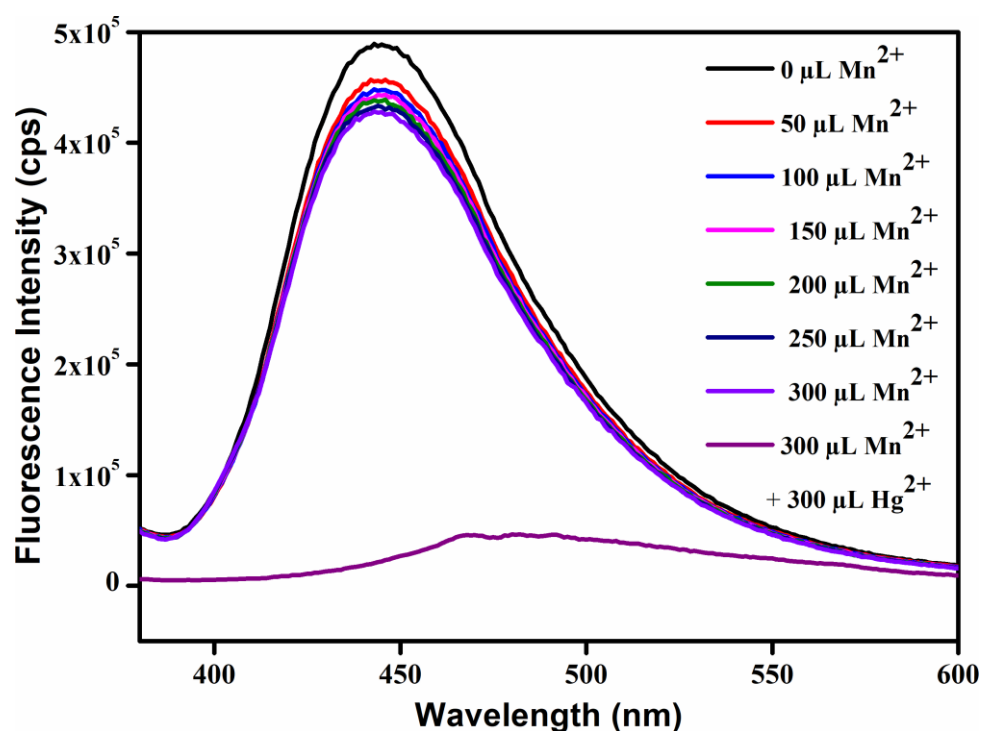

**Figure S27.** Change in fluorescence emission intensity of probe **Hf-UiO-66-NHCSNHCH<sub>3</sub>** with the addition of 300  $\mu\text{L}$  of 10 mM aqueous  $\text{Hg}^{2+}$  solution in the presence of 300  $\mu\text{L}$  of 10 mM aqueous  $\text{Mn}^{2+}$  solution.

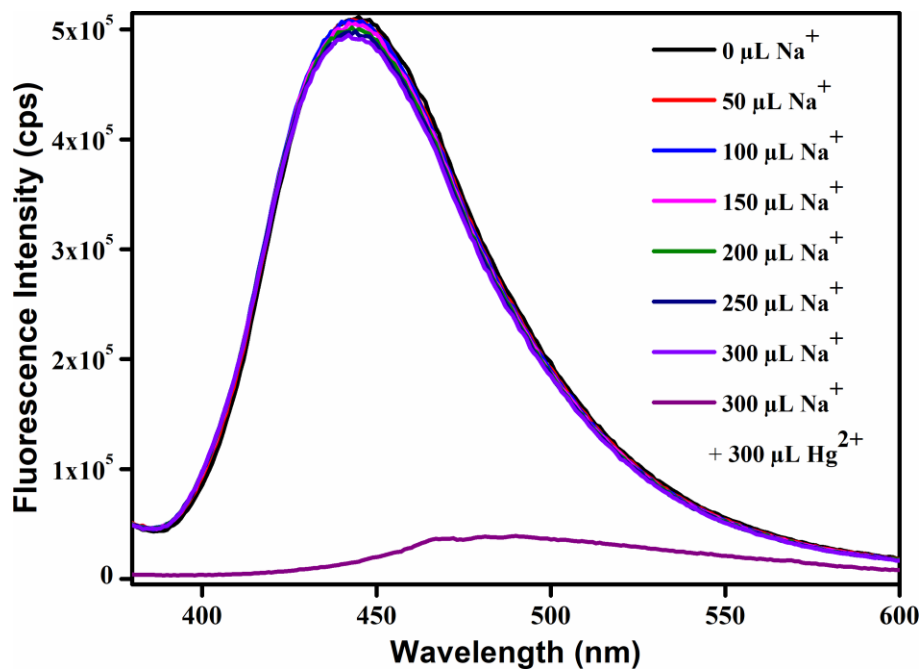

**Figure S28.** Change in fluorescence emission intensity of probe **Hf-UiO-66-NHCSNHCH<sub>3</sub>** with the addition of 300  $\mu\text{L}$  of 10 mM aqueous  $\text{Hg}^{2+}$  solution in the presence of 300  $\mu\text{L}$  of 10 mM aqueous  $\text{Na}^+$  solution.

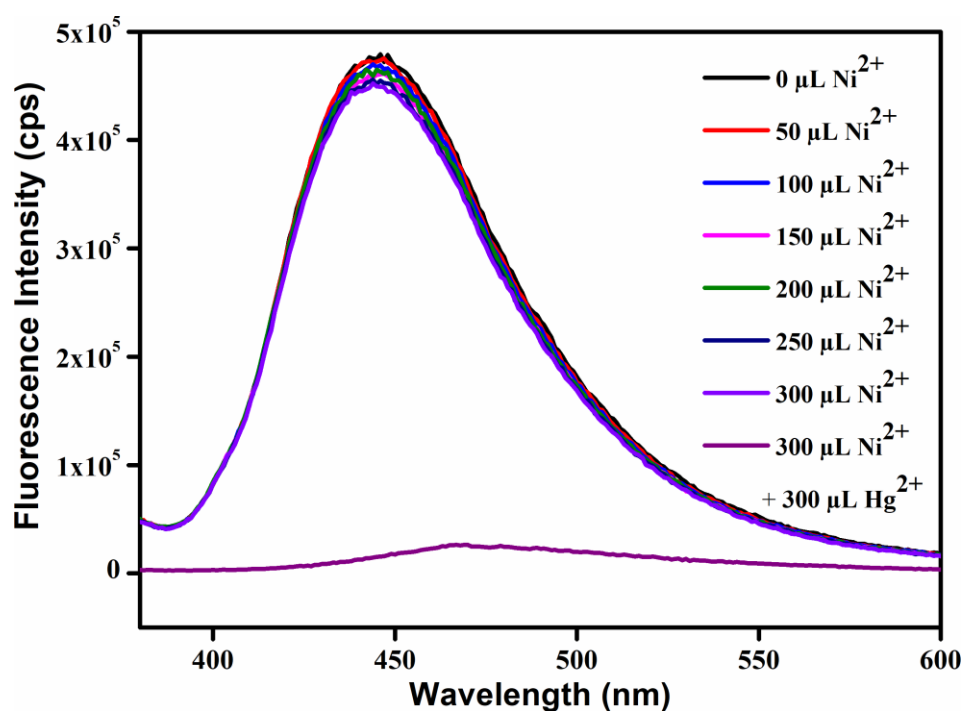

**Figure S29.** Change in fluorescence emission intensity of probe **Hf-UiO-66-NHCSNHCH<sub>3</sub>** with the addition of 300 μL of 10 mM aqueous Hg<sup>2+</sup> solution in the presence of 300 μL of 10 mM aqueous Ni<sup>2+</sup> solution.

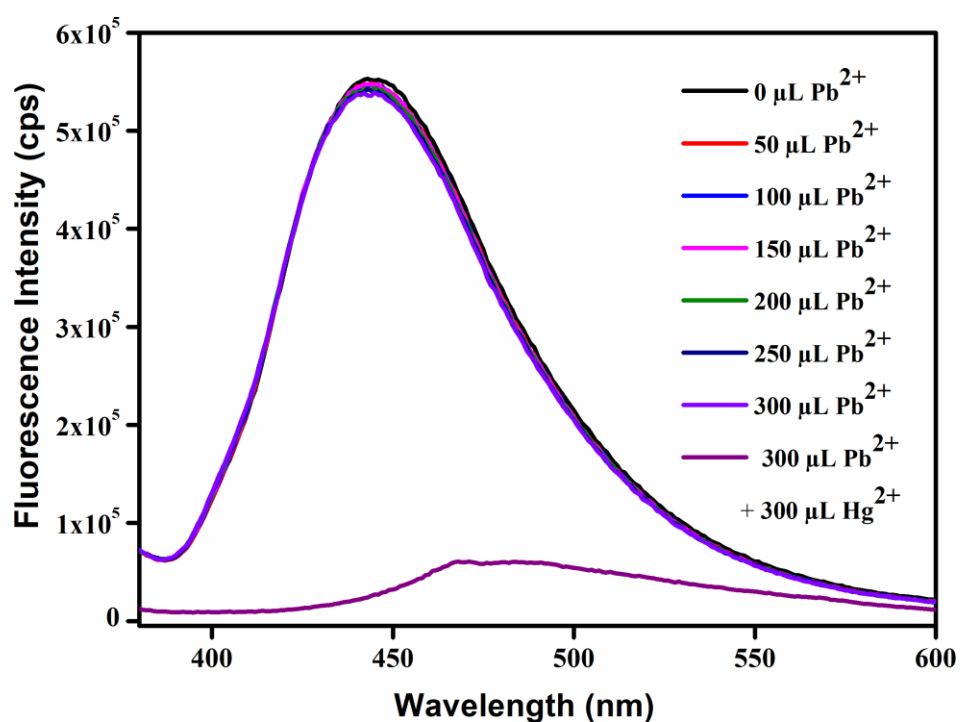

**Figure S30.** Change in fluorescence emission intensity of probe **Hf-UiO-66-NHCSNHCH<sub>3</sub>** with the addition of 300 μL of 10 mM aqueous Hg<sup>2+</sup> solution in the presence of 300 μL of 10 mM aqueous Pb<sup>2+</sup> solution.

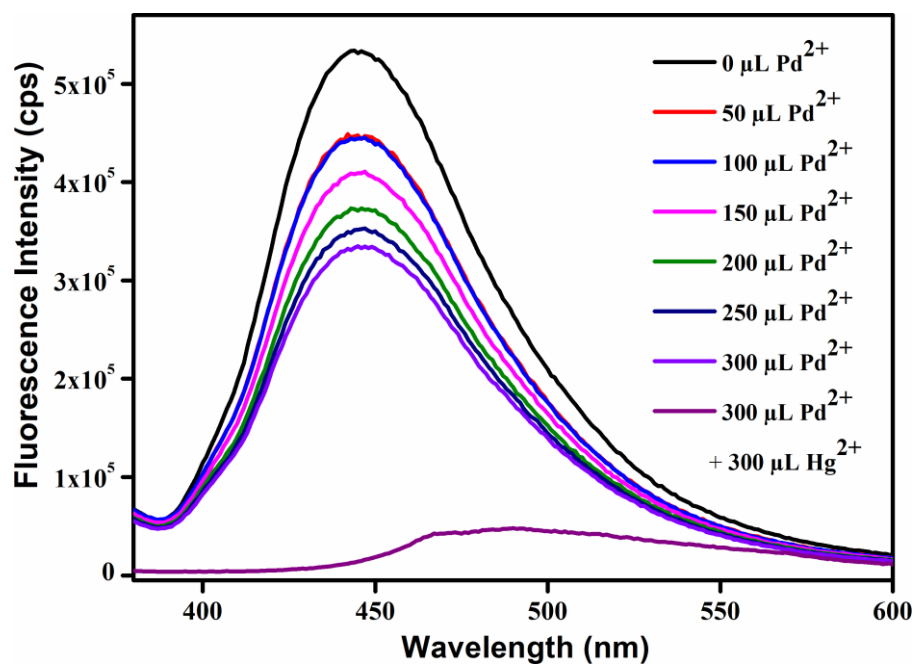

**Figure S31.** Change in fluorescence emission intensity of probe **Hf-UiO-66-NHCSNHCH<sub>3</sub>** with the addition of 300  $\mu\text{L}$  of 10 mM aqueous  $\text{Hg}^{2+}$  solution in the presence of 300  $\mu\text{L}$  of 10 mM aqueous  $\text{Pd}^{2+}$  solution.

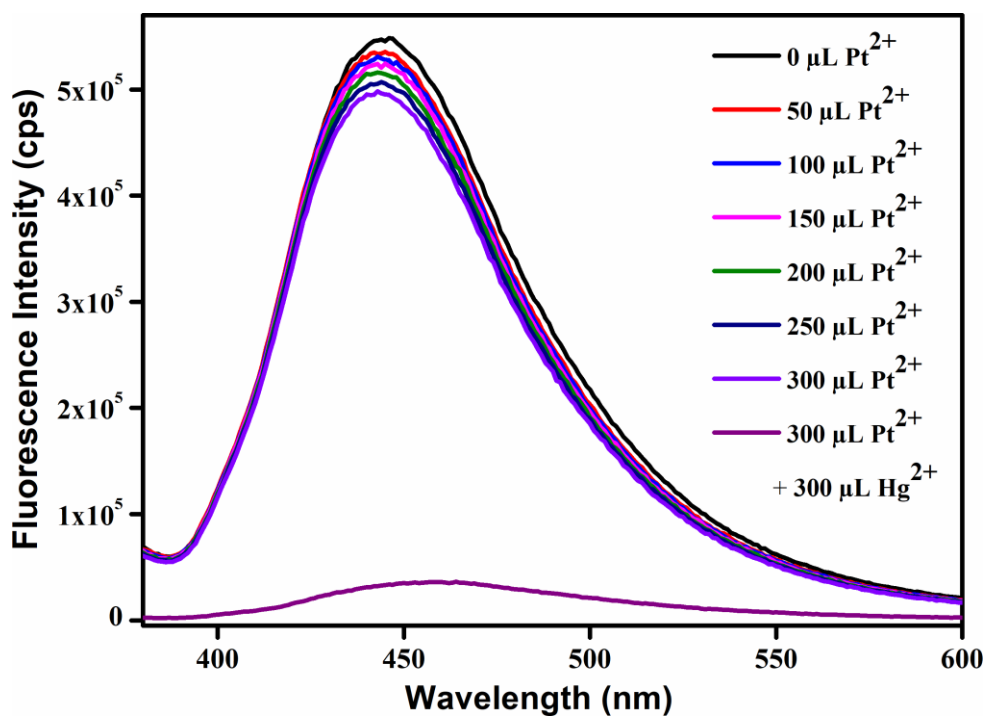

**Figure S32.** Change in fluorescence emission intensity of probe **Hf-UiO-66-NHCSNHCH<sub>3</sub>** with the addition of 300  $\mu\text{L}$  of 10 mM aqueous  $\text{Hg}^{2+}$  solution in the presence of 300  $\mu\text{L}$  of 10 mM aqueous  $\text{Pt}^{2+}$  solution.

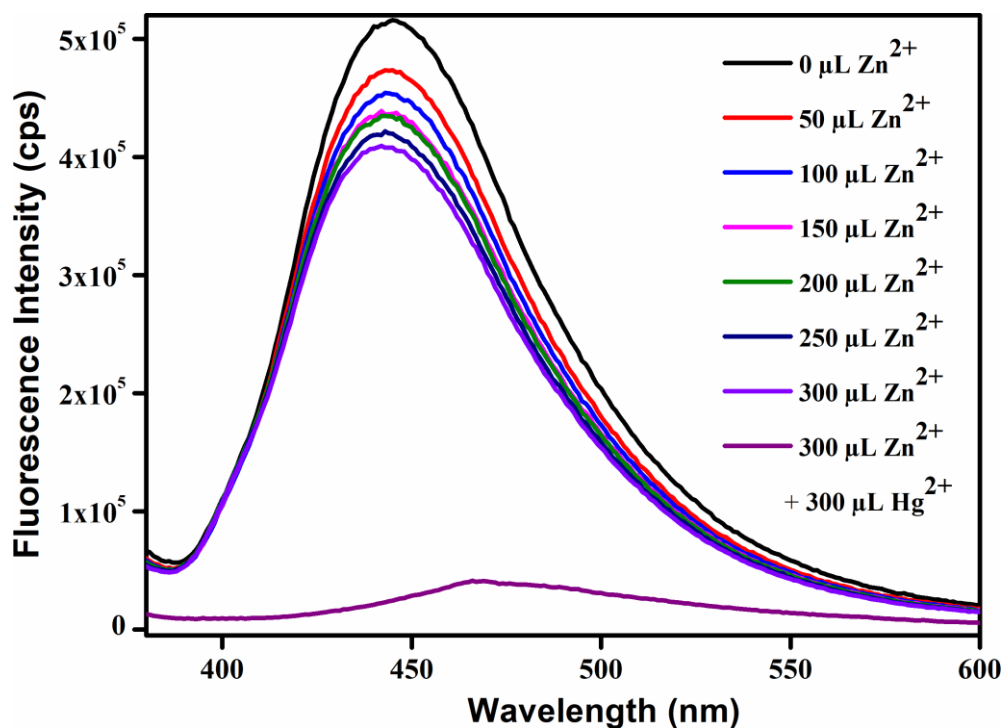

**Figure S33.** Change in fluorescence emission intensity of probe **Hf-UiO-66-NHCSNHCH<sub>3</sub>** with the addition of 300  $\mu\text{L}$  of 10 mM aqueous  $\text{Hg}^{2+}$  solution in the presence of 300  $\mu\text{L}$  of 10 mM aqueous  $\text{Zn}^{2+}$  solution.

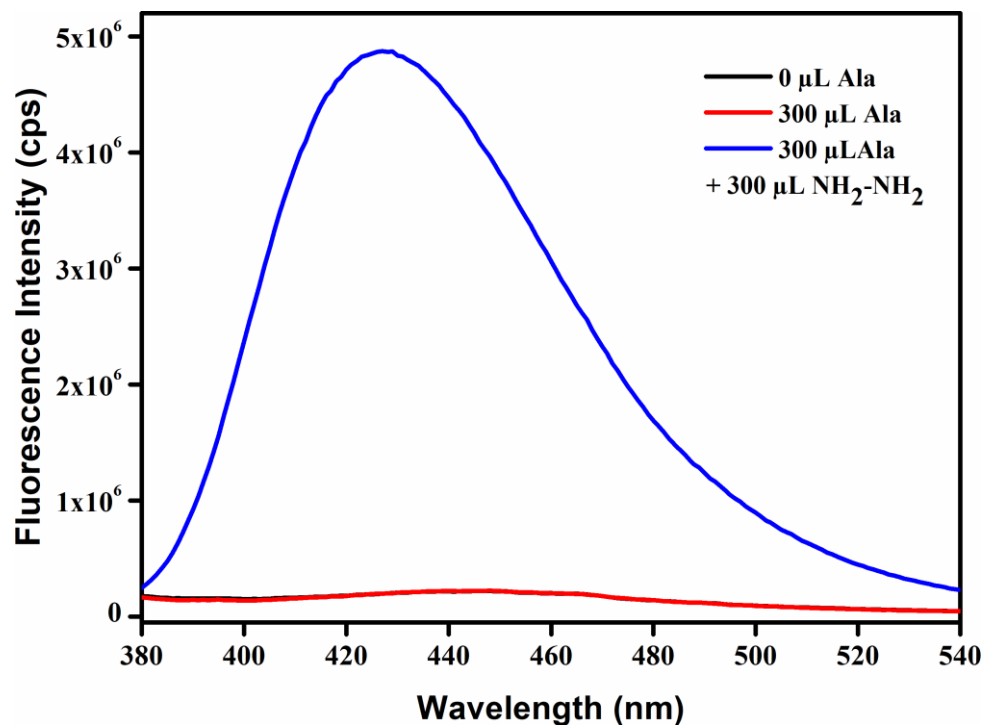

**Figure S34.** Change in fluorescence emission intensity of probe **Hf-UiO-66-NHCSNHCH<sub>3</sub>** with the addition of 300  $\mu\text{L}$  of 10 mM aqueous hydrazine solution in the presence of 300  $\mu\text{L}$  of 10 mM aqueous alanine solution.

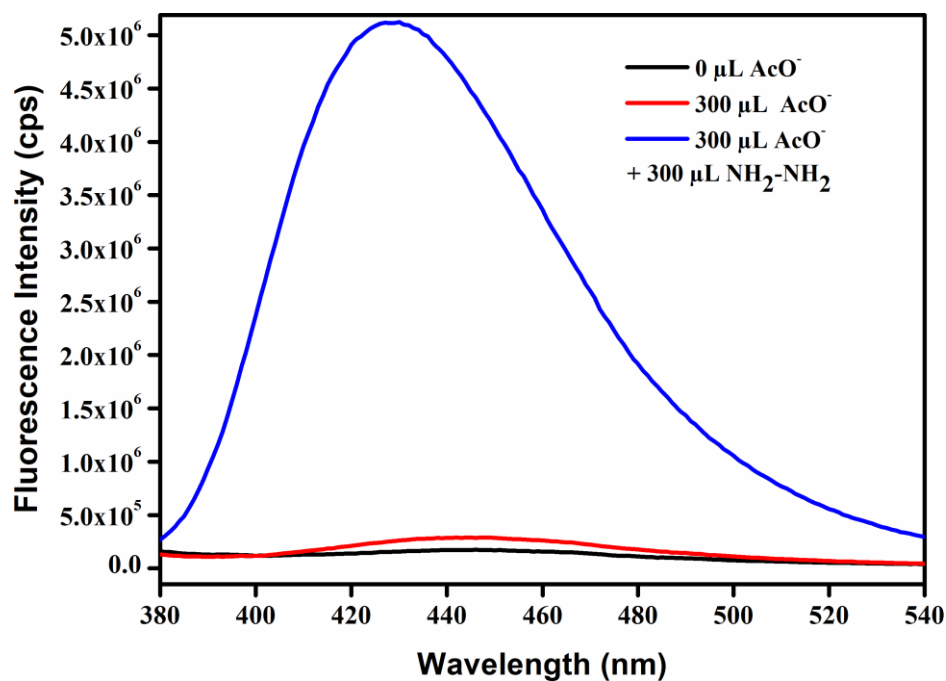

**Figure S35.** Change in fluorescence emission intensity of probe **Hf-UiO-66-NHCSNHCH<sub>3</sub>** with the addition of 300  $\mu\text{L}$  of 10 mM aqueous hydrazine solution in the presence of 300  $\mu\text{L}$  of 10 mM aqueous  $\text{CH}_3\text{COO}^-$  solution.

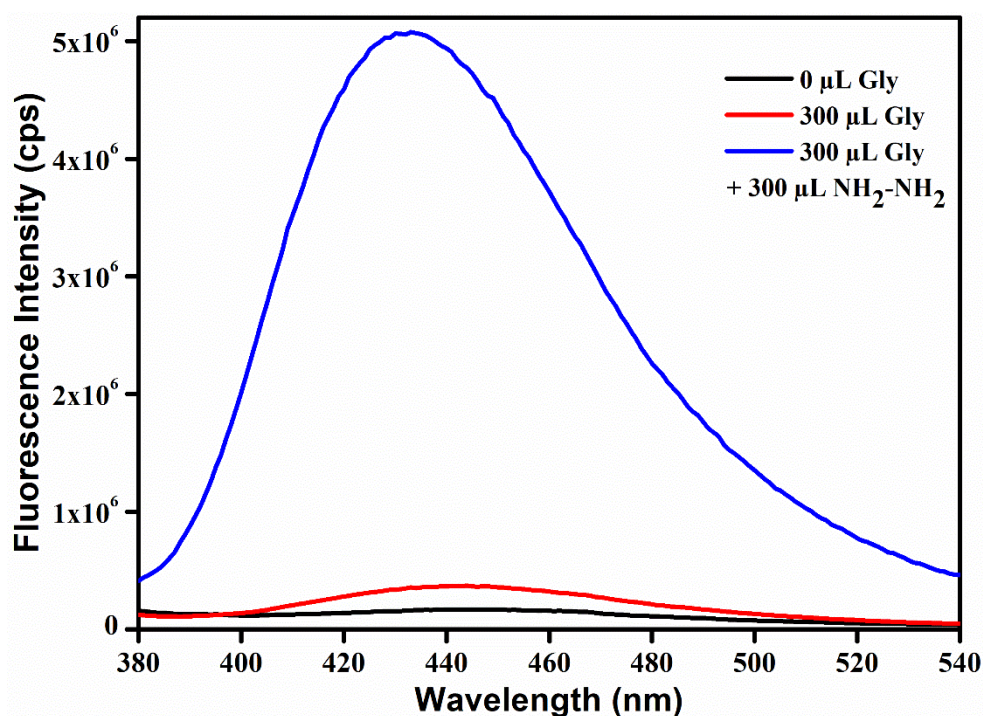

**Figure S36.** Change in fluorescence emission intensity of probe **Hf-UiO-66-NHCSNHCH<sub>3</sub>** with the addition of 300  $\mu\text{L}$  of 10 mM aqueous hydrazine solution in the presence of 300  $\mu\text{L}$  of 10 mM aqueous glycine solution.

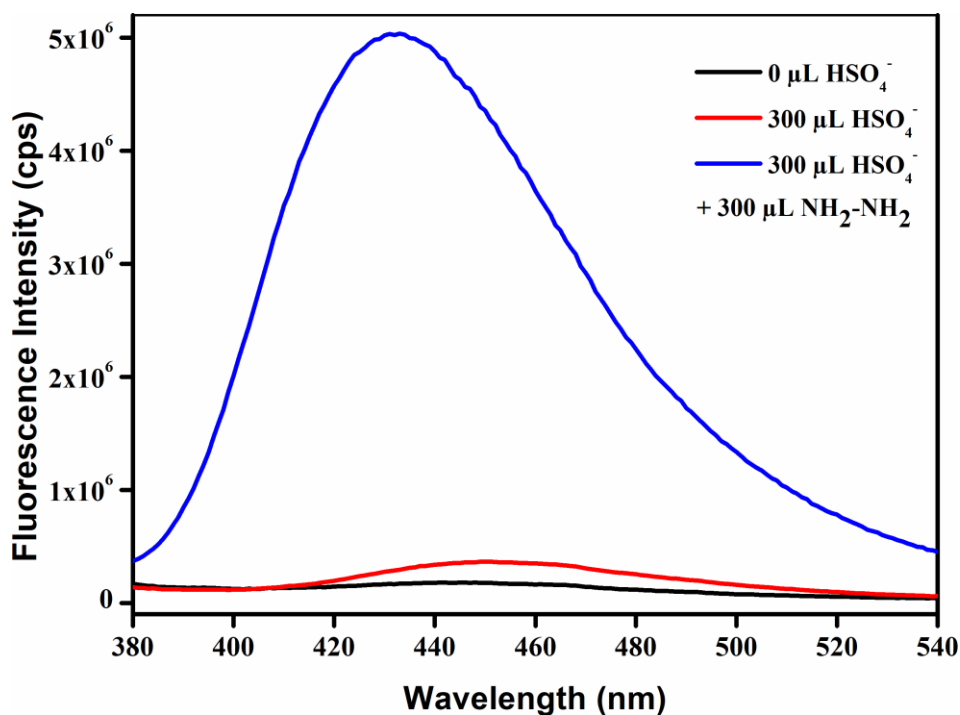

**Figure S37.** Change in fluorescence emission intensity of probe **Hf-UiO-66-NHCSNHCH<sub>3</sub>** with the addition of 300  $\mu\text{L}$  of 10 mM aqueous hydrazine solution in the presence of 300  $\mu\text{L}$  of 10 mM aqueous  $\text{HSO}_4^-$  solution.

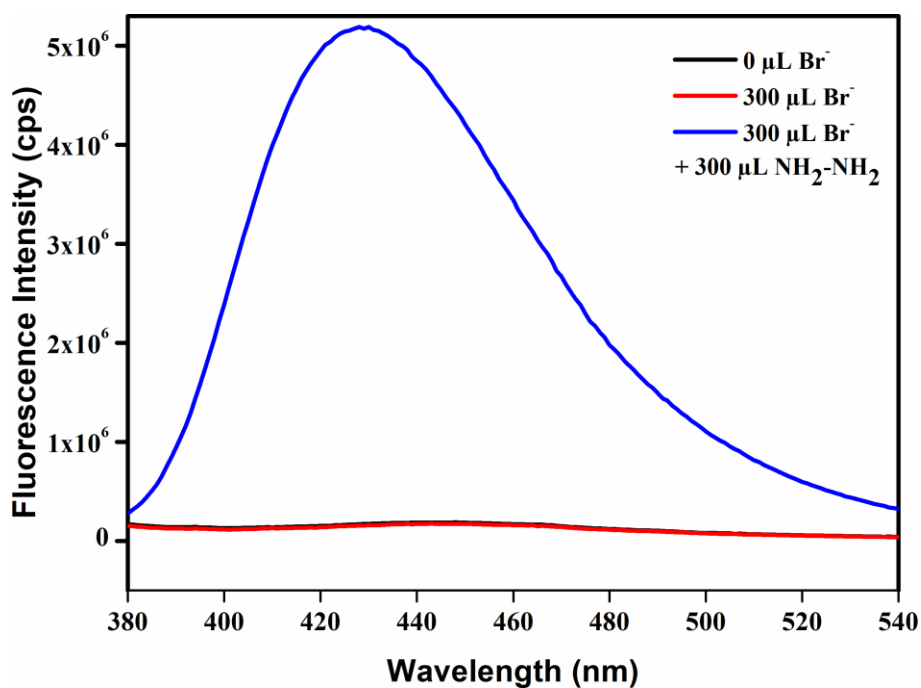

**Figure S38.** Change in fluorescence emission intensity of probe **Hf-UiO-66-NHCSNHCH<sub>3</sub>** with the addition of 300  $\mu\text{L}$  of 10 mM aqueous hydrazine solution in the presence of 300  $\mu\text{L}$  of 10 mM aqueous  $\text{Br}^-$  solution.

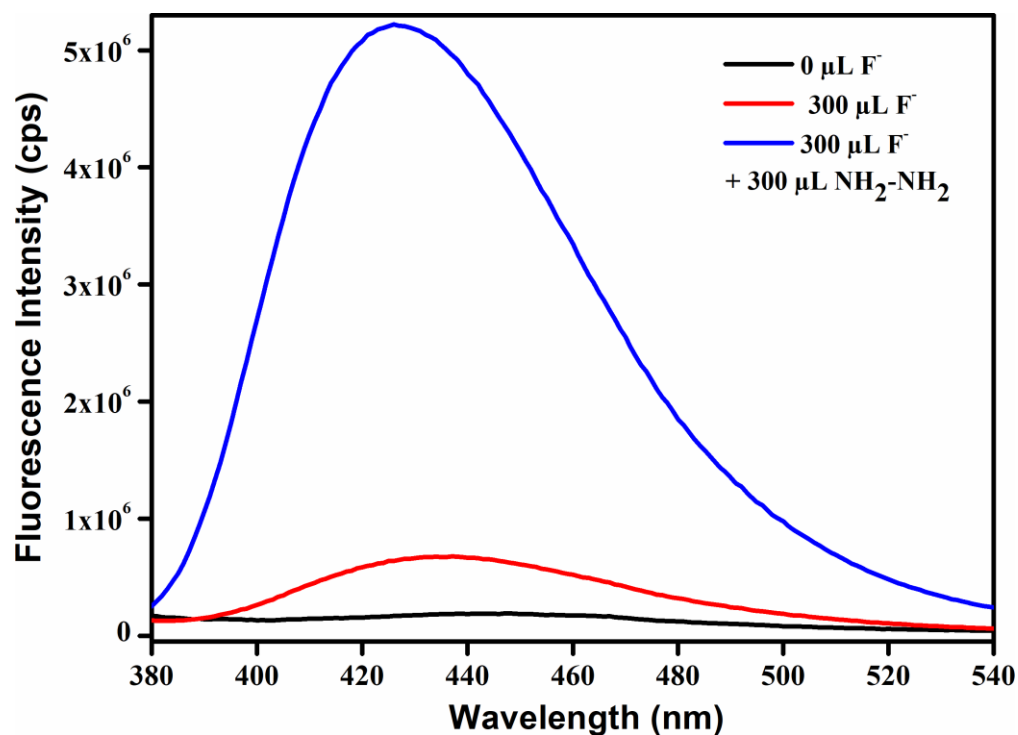

**Figure S39.** Change in fluorescence emission intensity of probe **Hf-UiO-66-NHCSNHCH<sub>3</sub>** with the addition of 300 μL of 10 mM aqueous hydrazine solution in the presence of 300 μL of 10 mM aqueous F<sup>-</sup> solution.

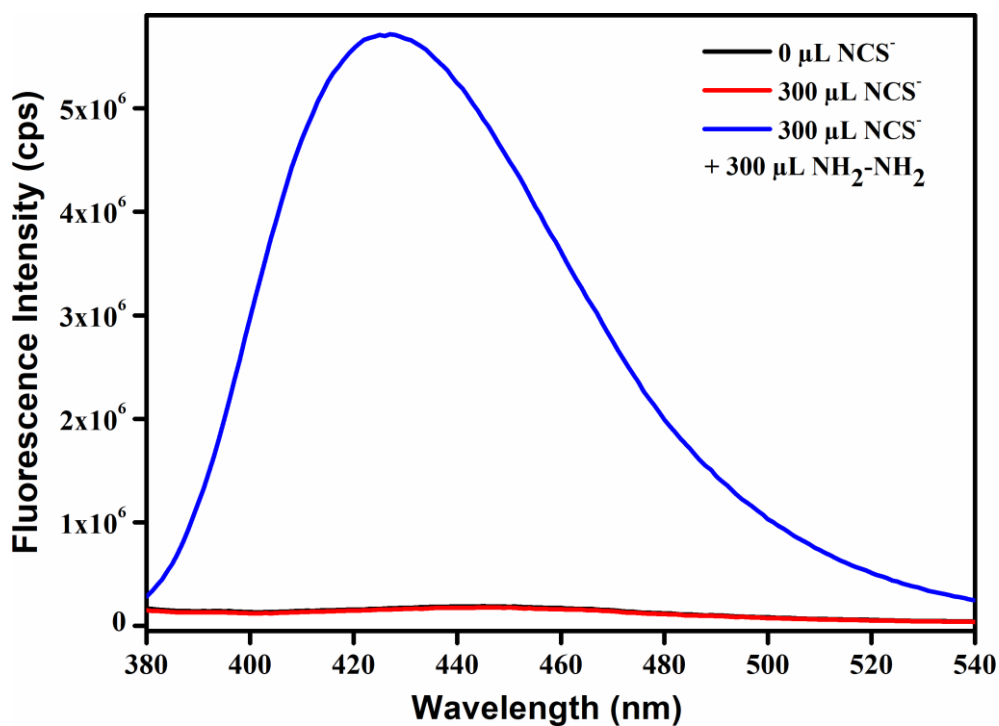

**Figure S40.** Change in fluorescence emission intensity of probe **Hf-UiO-66-NHCSNHCH<sub>3</sub>** with the addition of 300 μL of 10 mM aqueous hydrazine solution in the presence of 300 μL of 10 mM aqueous NCS<sup>-</sup> solution.

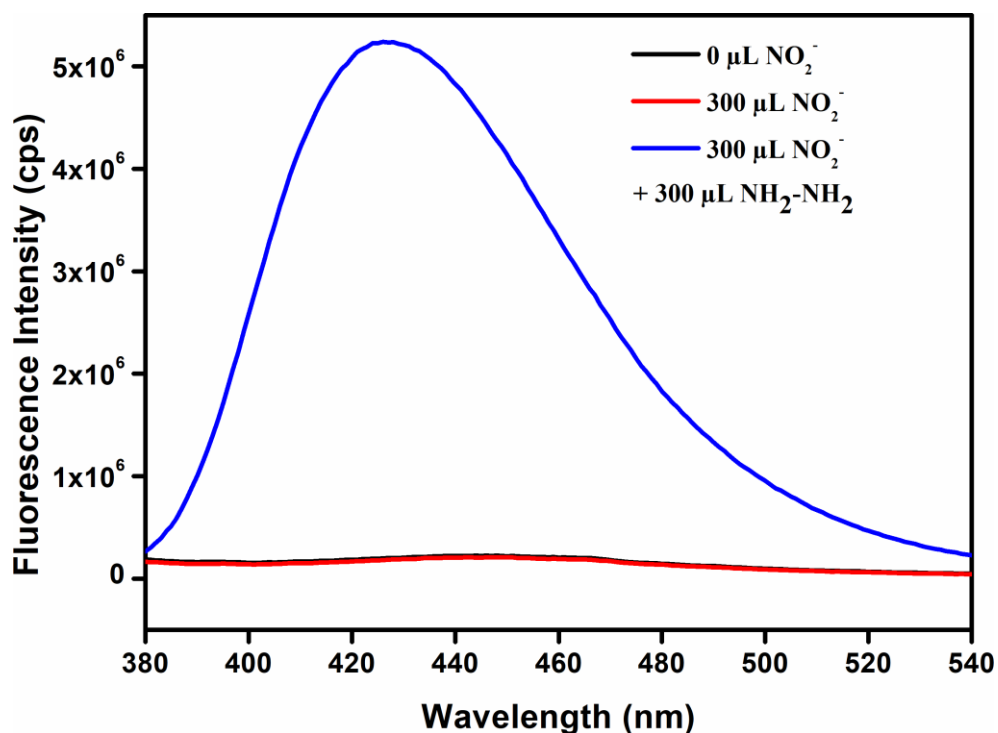

**Figure S41.** Change in fluorescence emission intensity of probe **Hf-UiO-66-NHCSNHCH<sub>3</sub>** with the addition of 300  $\mu\text{L}$  of 10 mM aqueous hydrazine solution in the presence of 300  $\mu\text{L}$  of 10 mM aqueous  $\text{NO}_2^-$  solution.

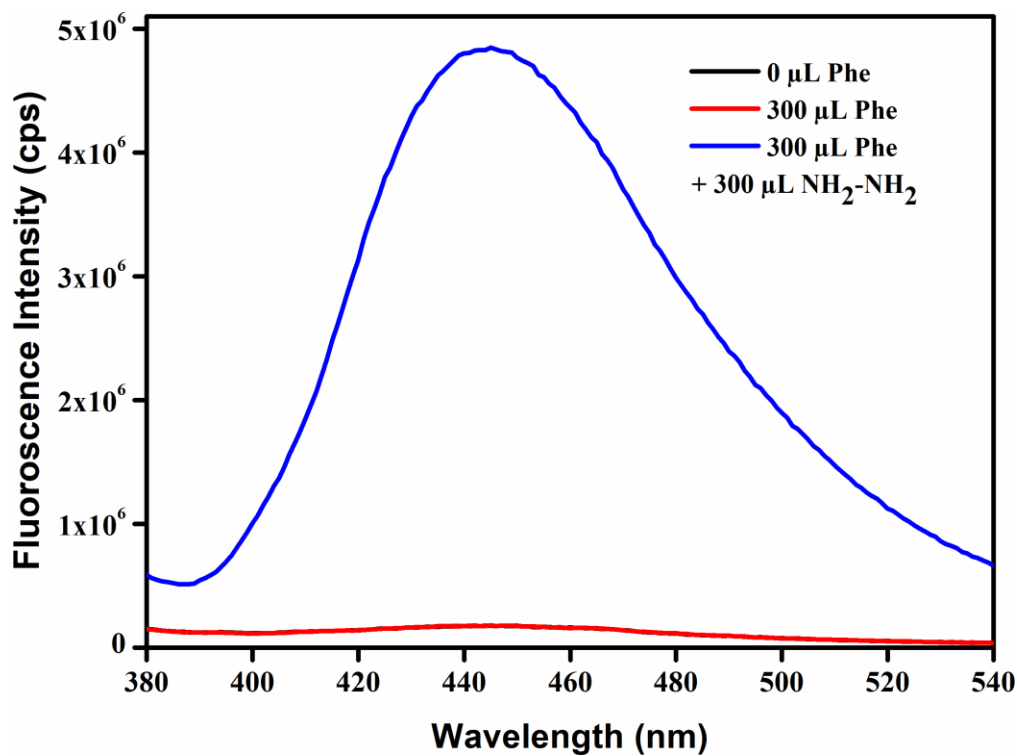

**Figure S42.** Change in fluorescence emission intensity of probe **Hf-UiO-66-NHCSNHCH<sub>3</sub>** with the addition of 300  $\mu\text{L}$  of 10 mM aqueous hydrazine solution in the presence of 300  $\mu\text{L}$  of 10 mM aqueous phenyl alanine solution.



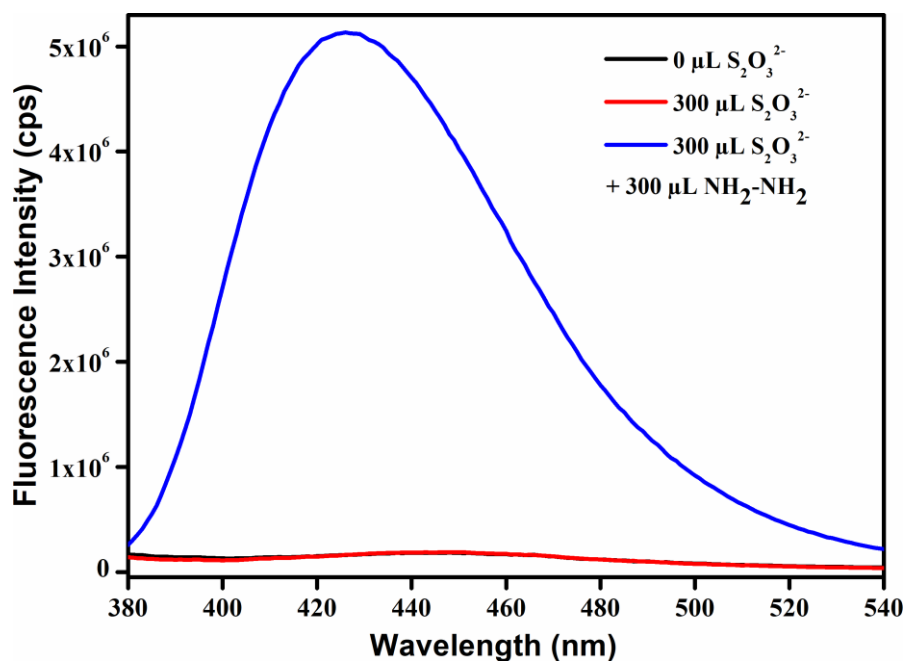

**Figure S43.** Change in fluorescence emission intensity of probe **Hf-UiO-66-NHCSNHCH<sub>3</sub>** with the addition of 300 μL of 10 mM aqueous hydrazine solution in the presence of 300 μL of 10 mM aqueous S<sub>2</sub>O<sub>3</sub><sup>2-</sup> solution.

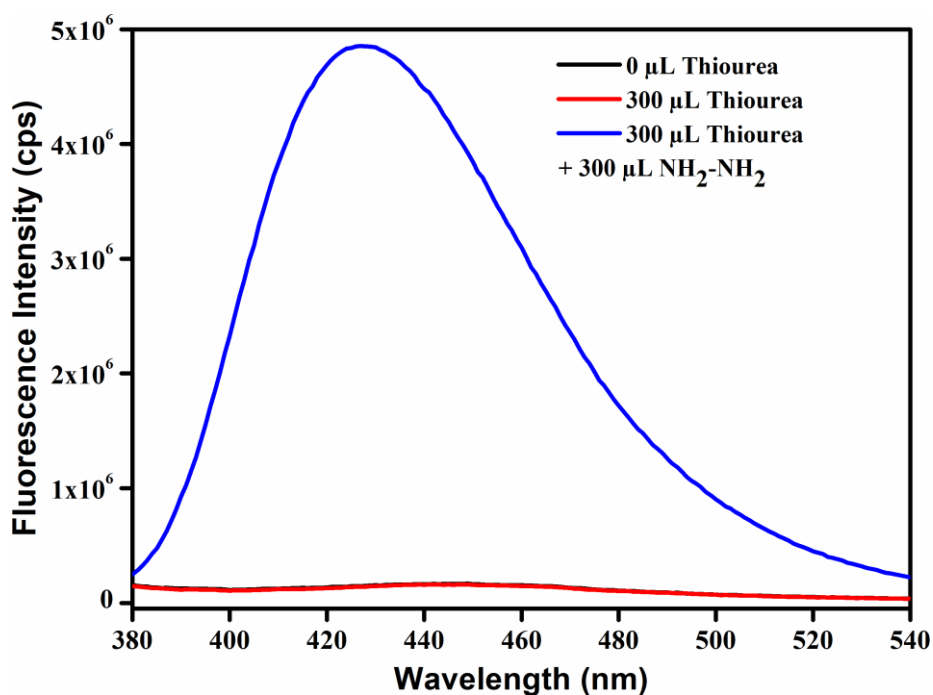

**Figure S44.** Change in fluorescence emission intensity of probe **Hf-UiO-66-NHCSNHCH<sub>3</sub>** with the addition of 300 μL of 10 mM aqueous hydrazine solution in the presence of 300 μL of 10 mM aqueous thiourea solution.

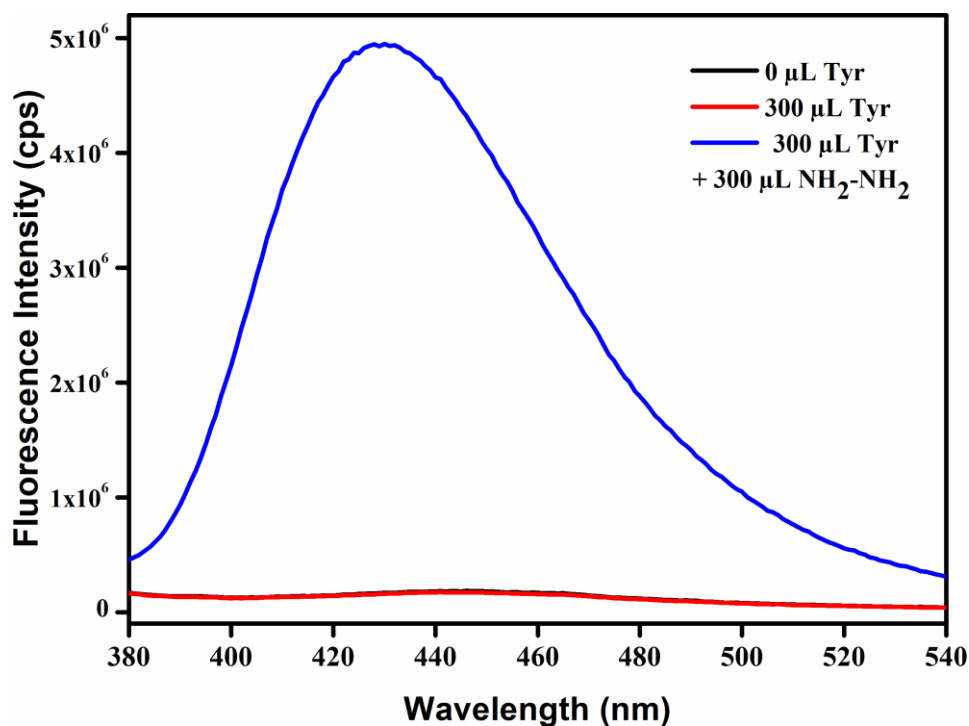

**Figure S45.** Change in fluorescence emission intensity of probe **Hf-UiO-66-NHCSNHCH<sub>3</sub>** with the addition of 300  $\mu$ L of 10 mM aqueous hydrazine solution in the presence of 300  $\mu$ L of 10 mM aqueous tyrosine solution.

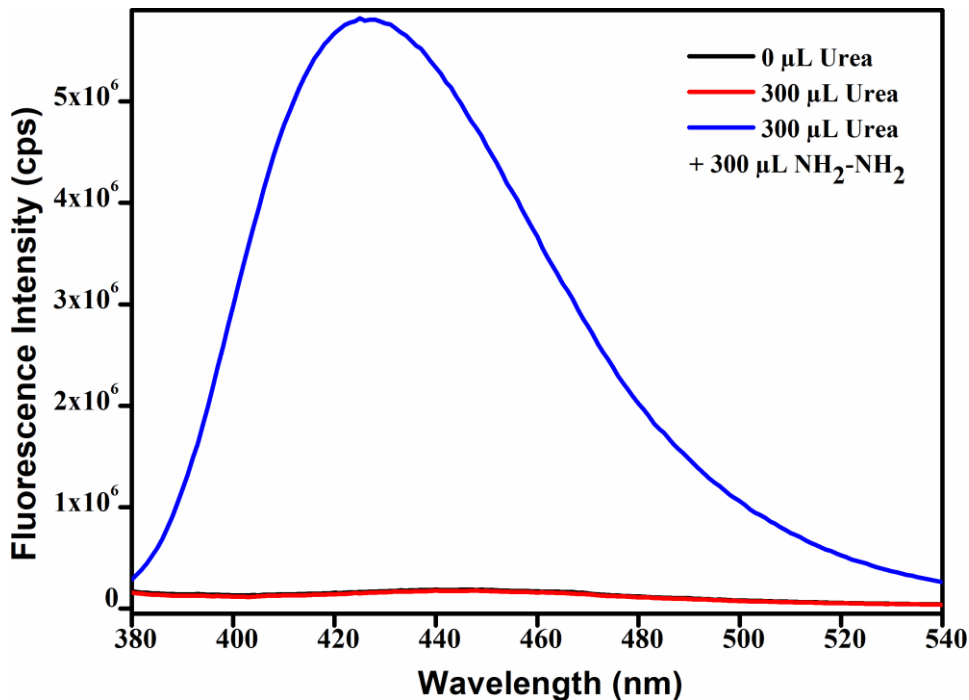

**Figure S46.** Change in fluorescence emission intensity of probe **Hf-UiO-66-NHCSNHCH<sub>3</sub>** with the addition of 300  $\mu$ L of 10 mM aqueous hydrazine solution in the presence of 300  $\mu$ L of 10 mM aqueous urea solution.

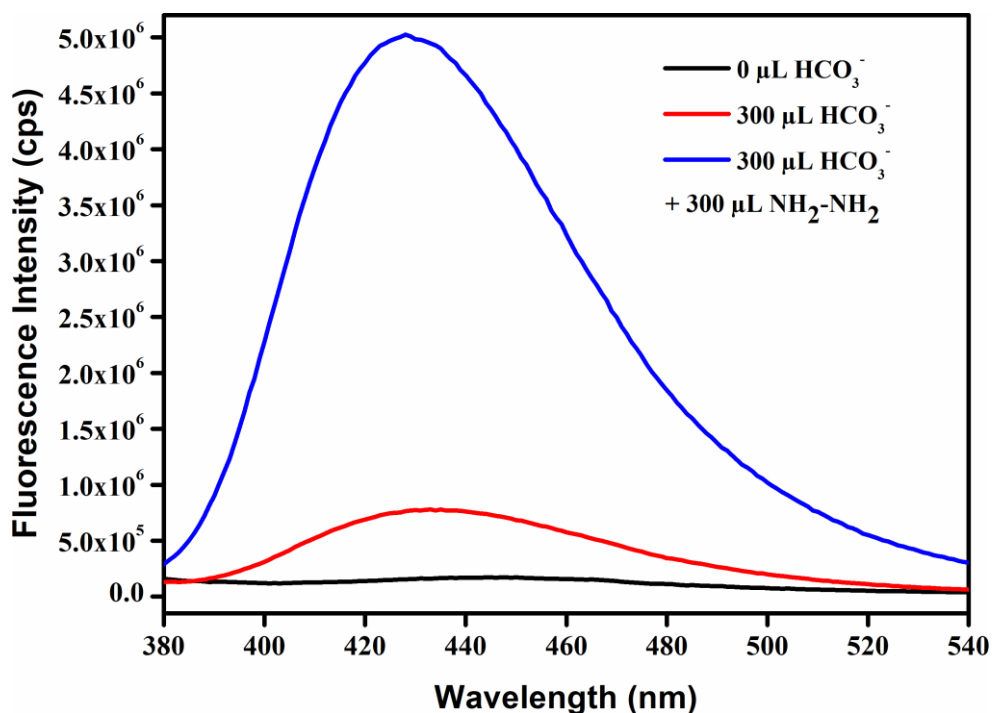

**Figure S47.** Change in fluorescence emission intensity of probe **Hf-UiO-66-NHCSNHCH<sub>3</sub>** with the addition of 300  $\mu\text{L}$  of 10 mM aqueous hydrazine solution in the presence of 300  $\mu\text{L}$  of 10 mM aqueous  $\text{HCO}_3^-$  solution.

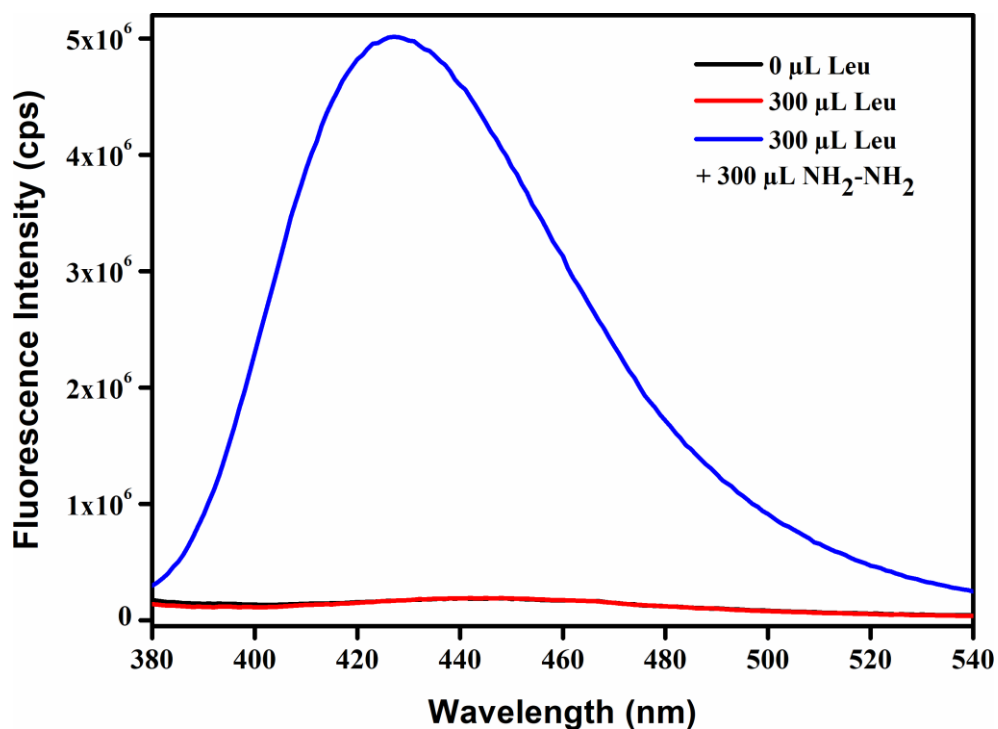

**Figure S48.** Change in fluorescence emission intensity of probe **Hf-UiO-66-NHCSNHCH<sub>3</sub>** with the addition of 300  $\mu\text{L}$  of 10 mM aqueous hydrazine solution in the presence of 300  $\mu\text{L}$  of 10 mM aqueous leucine solution.

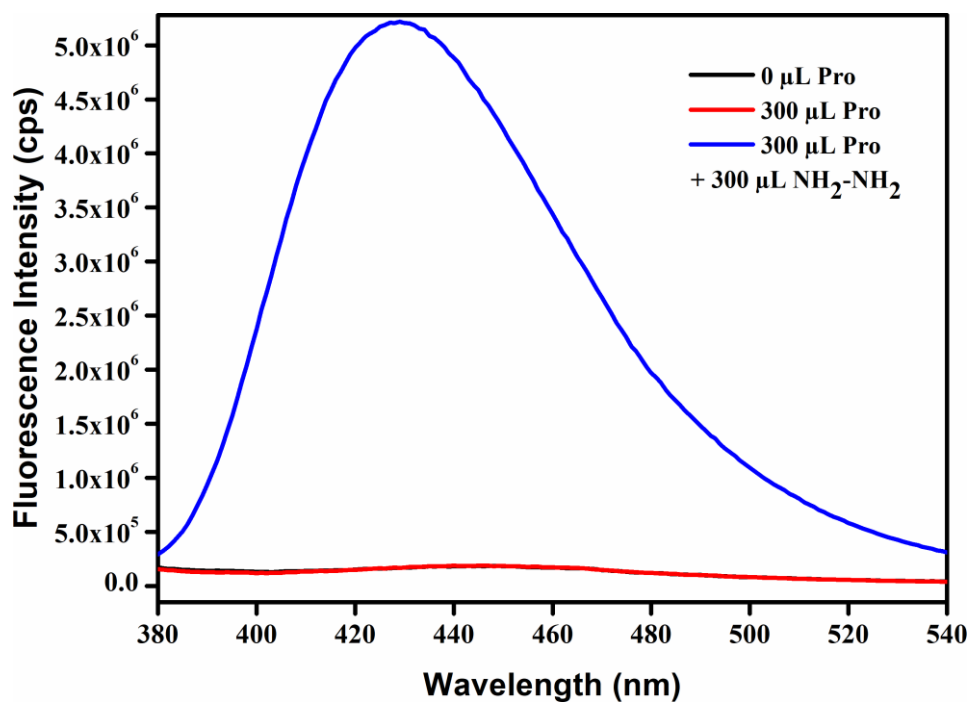

**Figure S49.** Change in fluorescence emission intensity of probe **Hf-UiO-66-NHCSNHCH<sub>3</sub>** with the addition of 300  $\mu\text{L}$  of 10 mM aqueous hydrazine solution in the presence of 300  $\mu\text{L}$  of 10 mM aqueous proline solution.

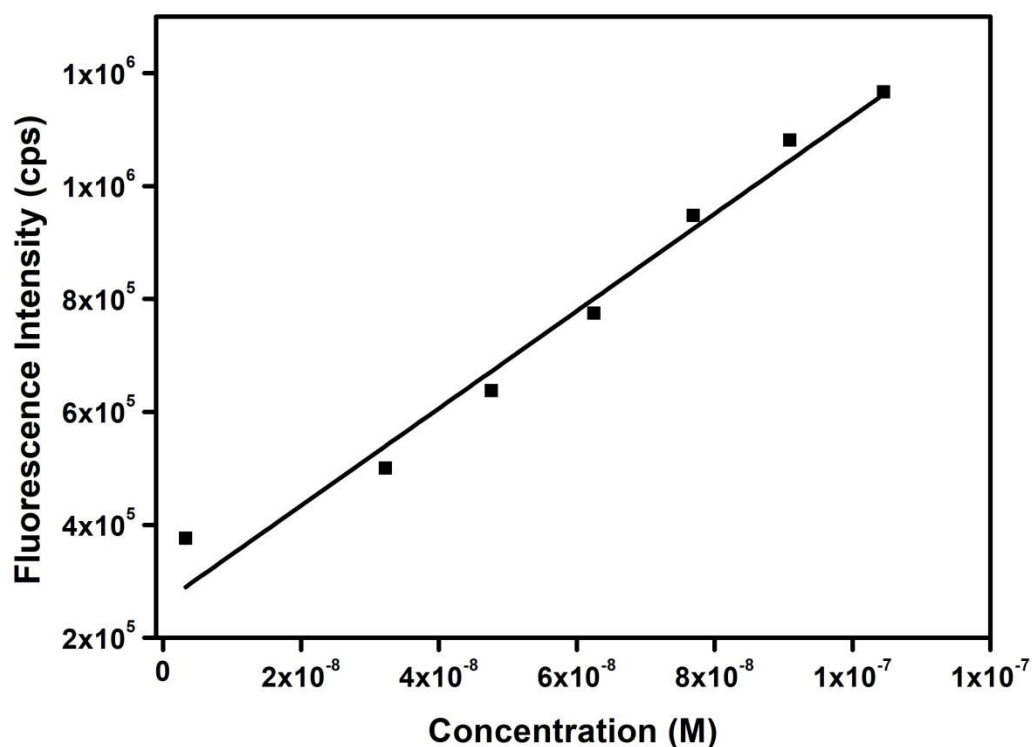

**Figure S50.** Change in the fluorescence intensity of **Hf-UiO-66-NHCSNHCH<sub>3</sub>** in water as a function of concentration of  $\text{NH}_2\text{-NH}_2$  (with error bars).

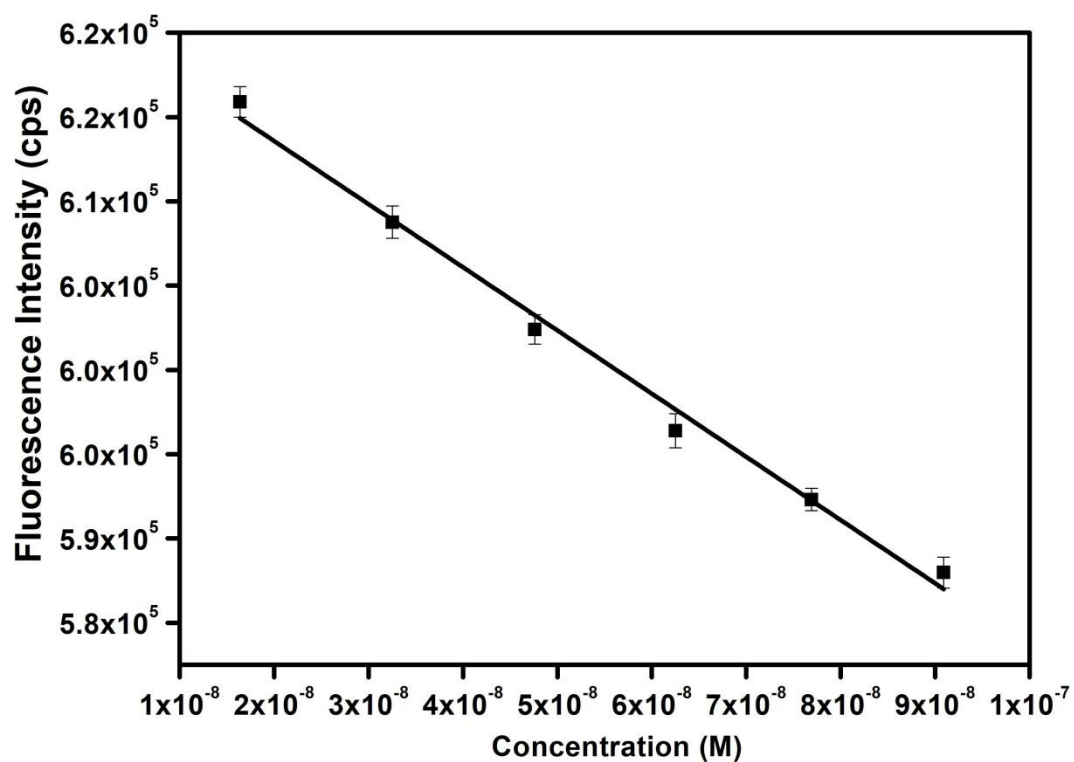

**Figure S51.** Change in the fluorescence intensity of **Hf-UiO-66-NHCSNHCH<sub>3</sub>** as a function of concentration of  $\text{Hg}^{2+}$  (with error bars).

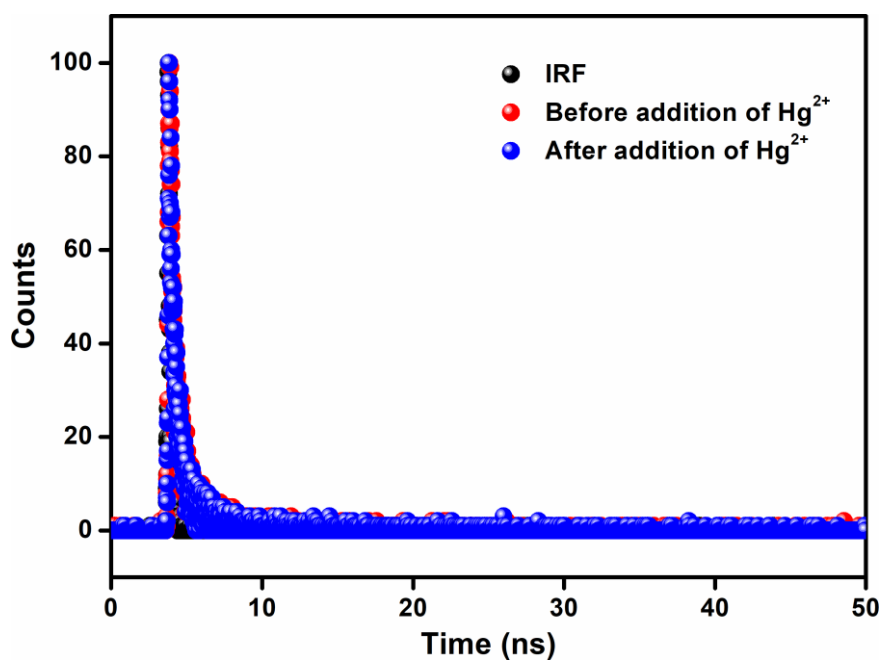

**Figure S52.** Fluorescence life-time decay curve of probe **Hf-UiO-66-NHCSNHCH<sub>3</sub>** before and after the addition of  $\text{Hg}^{2+}$ .

**Table S4.** Fluorescence life time change (in ns) of probe **Hf-UiO-66-NHCSNHCH<sub>3</sub>** before and after the addition of 300  $\mu\text{L}$  of aqueous  $\text{Hg}^{2+}$  solution.

| Volume of $\text{Hg}^{2+}$ solution added ( $\mu\text{L}$ ) | $B_1$  | $a_1$ | $\tau_1$ (ns) | $\langle\tau\rangle^*$ (ns) | $\chi^2$ |
|-------------------------------------------------------------|--------|-------|---------------|-----------------------------|----------|
| 0                                                           | 0.0782 | 1     | 0.476         | 0.476                       | 1.054    |
| 300                                                         | 0.0741 | 1     | 0.479         | 0.479                       | 1.001    |

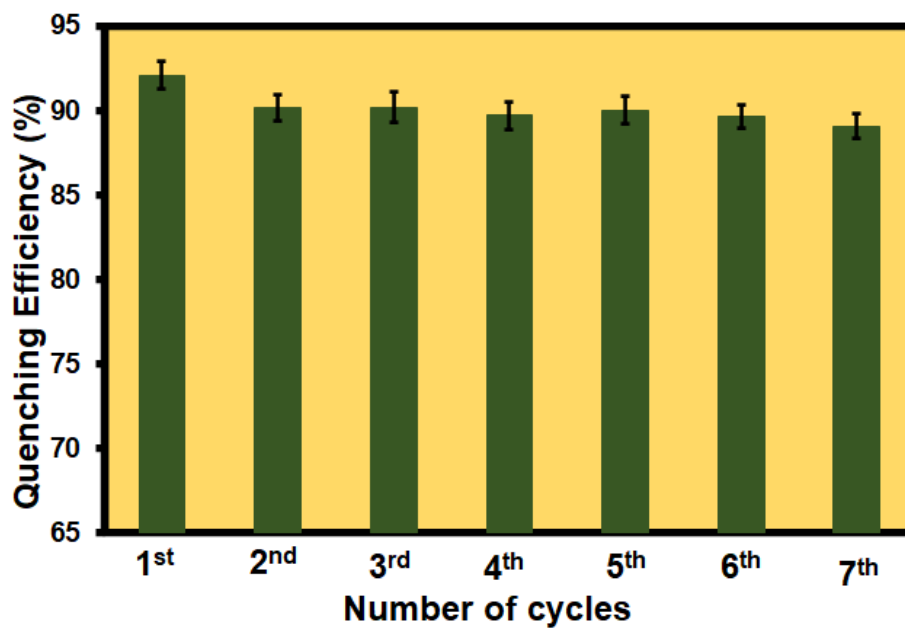

**Figure S53.** Recyclability of probe **Hf-UiO-66-NHCSNHCH<sub>3</sub>** towards the detection of  $\text{Hg}^{2+}$  for 7 cycles with almost equal quenching efficiency up to 7<sup>th</sup> cycle.

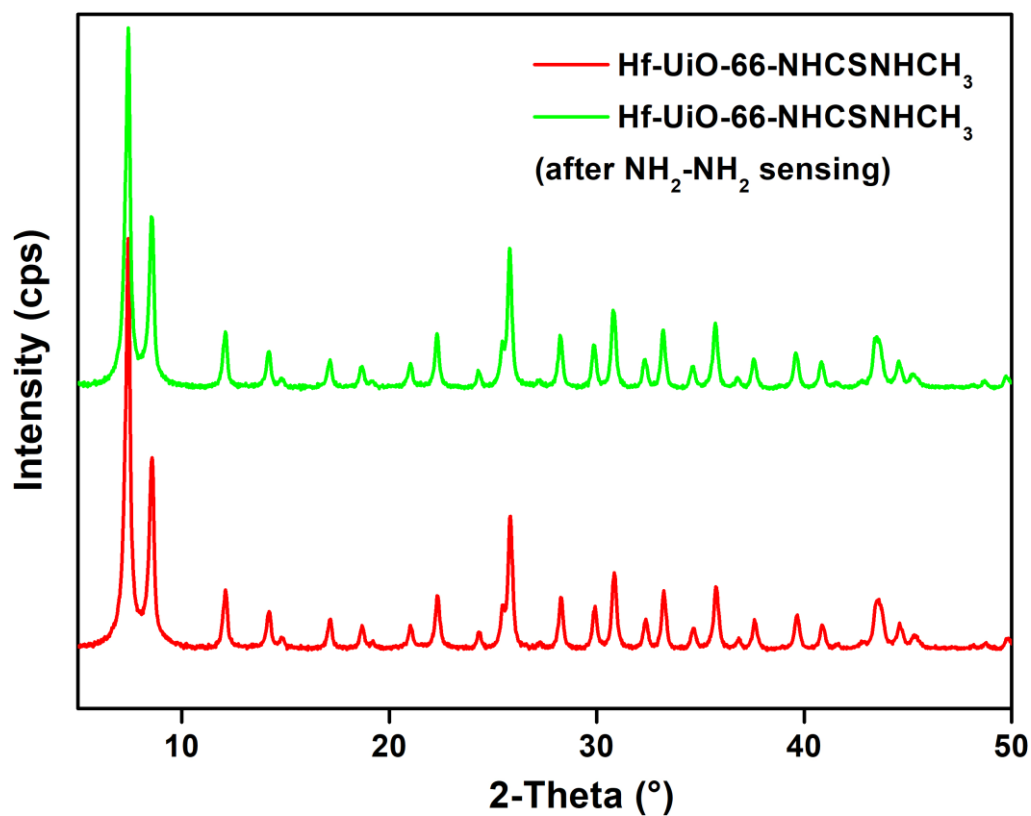

**Figure S54.** PXRD patterns of  $\text{Hf-UiO-66-NHCSNHCH}_3$  before (red) and after (green) sensing of hydrazine.

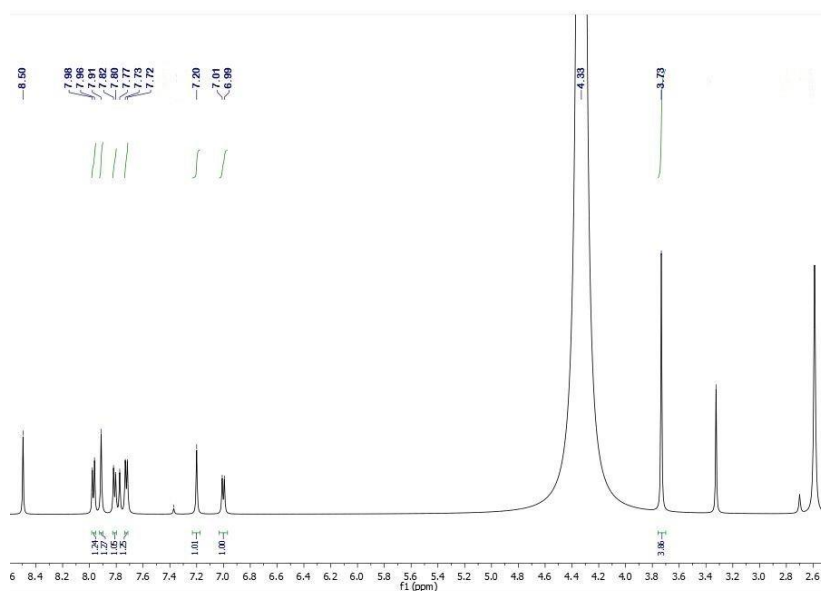

**Figure S55.** Digested  $^1\text{H}$  NMR spectrum of  $\text{Hf-UiO-66-NHCSNHCH}_3$  after treatment with hydrazine.

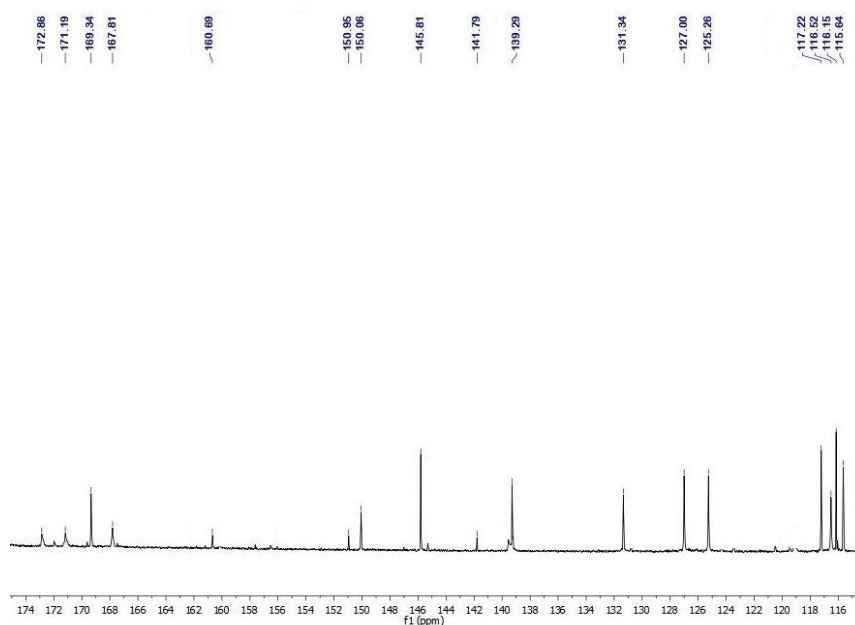

**Figure S56.** Digested  $^{13}\text{C}$  NMR spectrum of **Hf-UiO-66-NHCSNHCH<sub>3</sub>** after treatment with hydrazine.

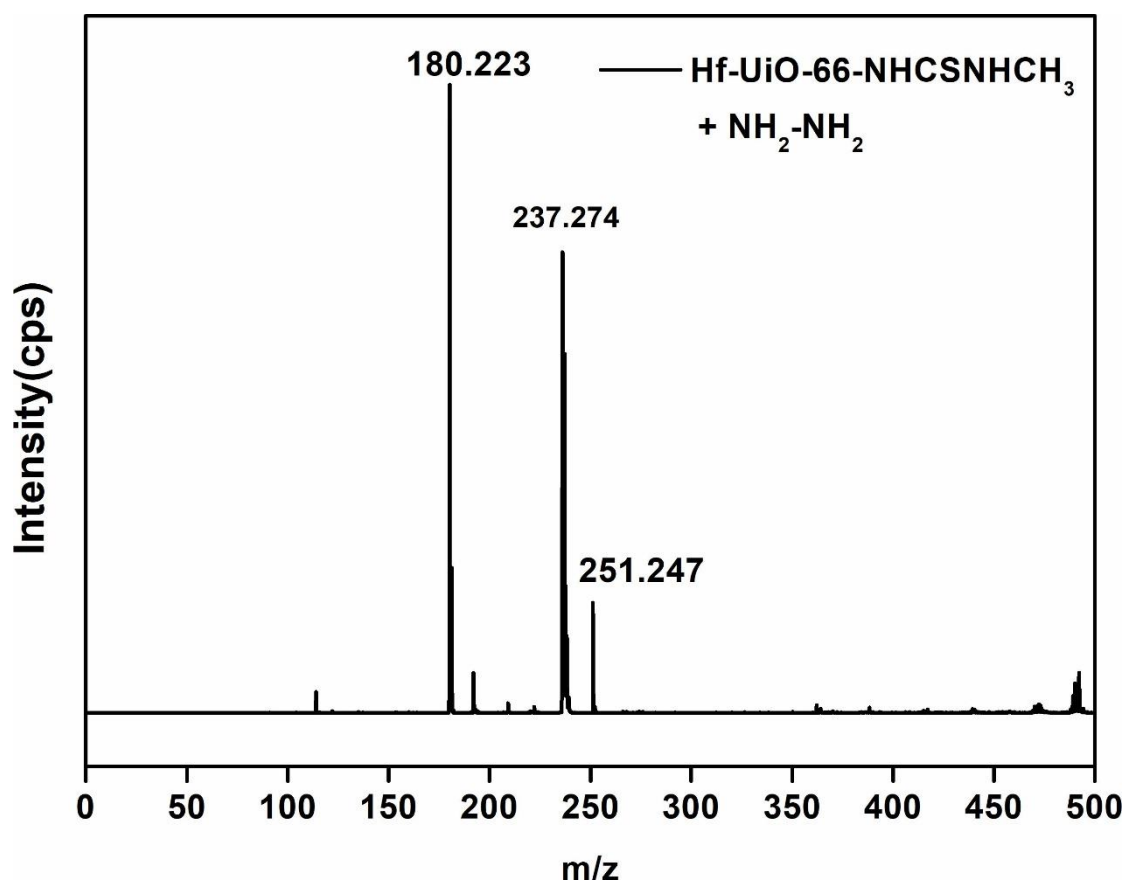

**Figure S57.** Digested mass spectra spectrum of **Hf-UiO-66-NHCSNHCH<sub>3</sub>** after treatment with hydrazine in methanol and water mixture.



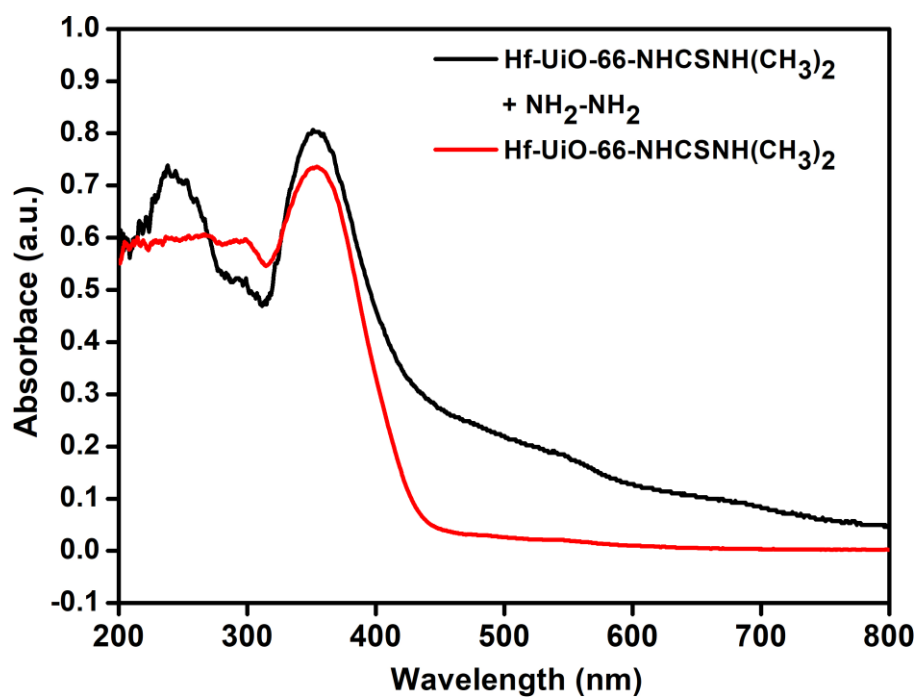

**Figure S58.** UV-Vis spectrum of **Hf-UiO-66-NHCSNHCH<sub>3</sub>** before (black) and after (red) sensing of  $\text{NH}_2\text{-NH}_2$  in solid state.

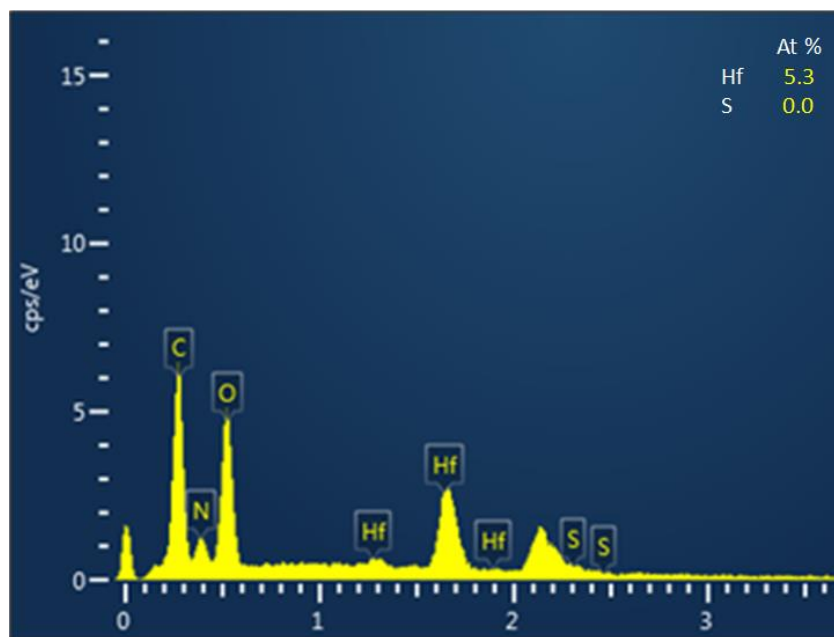

**Figure S59.** EDX spectrum of recovered **Hf-UiO-66-NHCSNHCH<sub>3</sub>** after sensing of  $\text{NH}_2\text{-NH}_2$ .

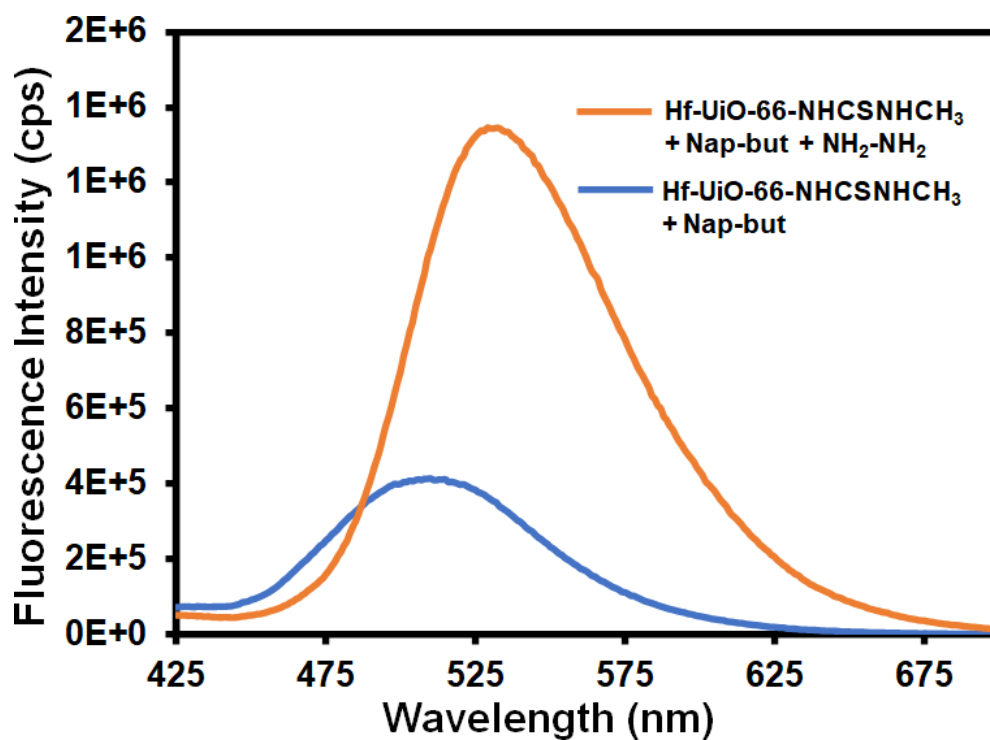

**Figure S60.** Change in fluorescence emission intensity of **Nap-but** ( $\text{H}_2\text{S}$  sensor) in the presence of probe **Hf-UiO-66-NHCSNHCH<sub>3</sub>** and after addition of  $\text{NH}_2\text{-NH}_2$ .

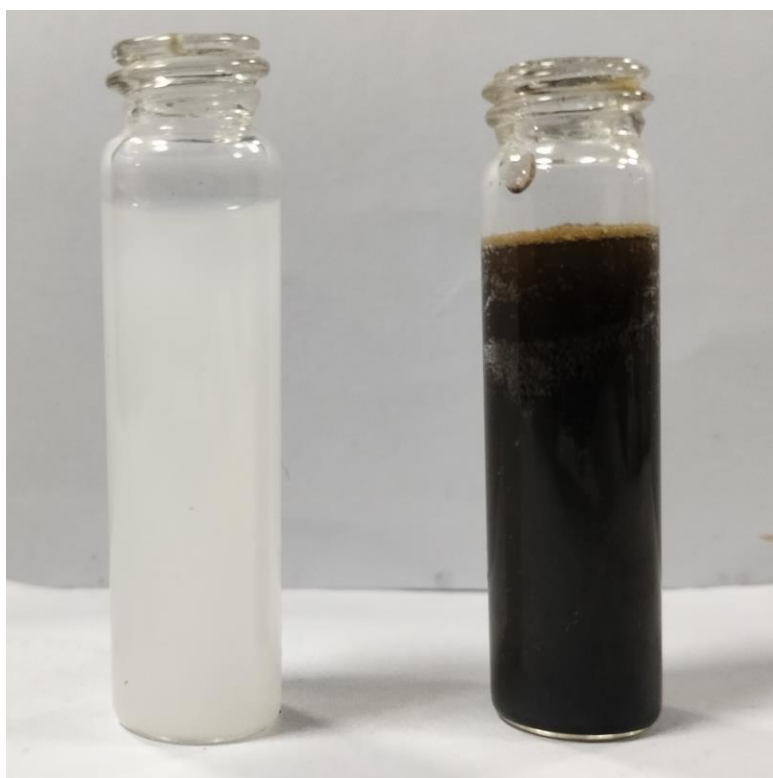

**Figure S61.** Change in colour of **Hf-UiO-66-NHCSNHCH<sub>3</sub>** +  $\text{Pb}(\text{CH}_3\text{COO})_2$  aqueous mixture after the addition of  $\text{NH}_2\text{-NH}_2$ .

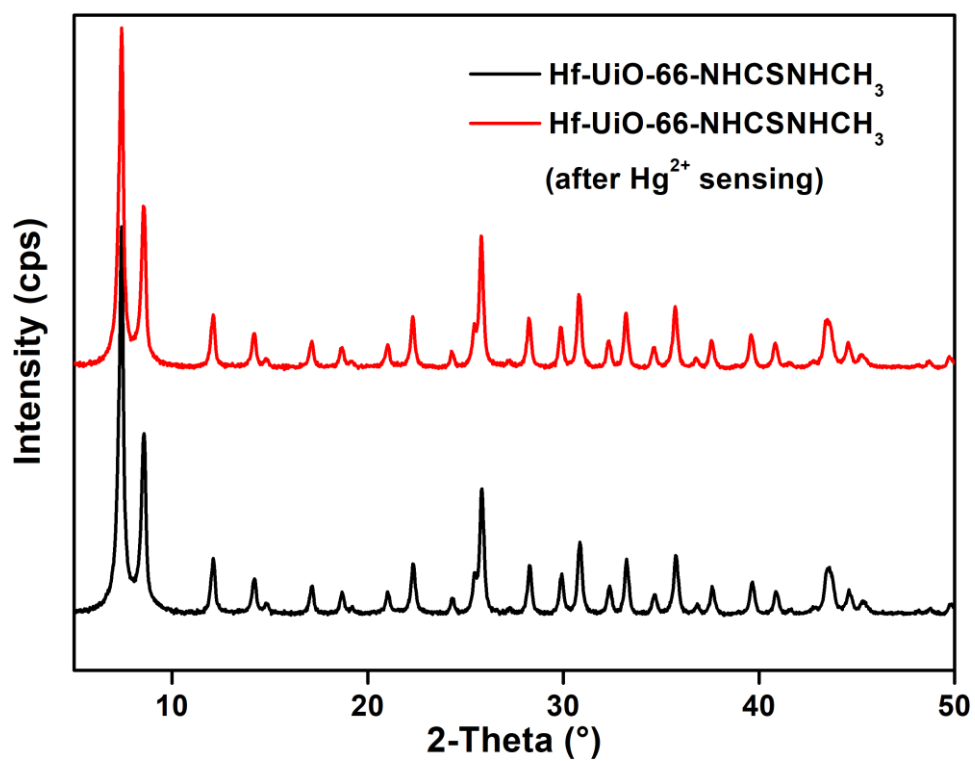

**Figure S62.** PXRD pattern of **Hf-UiO-66-NHCSNHCH<sub>3</sub>** before (black) and after (red) the addition of aqueous solution of Hg<sup>2+</sup>.

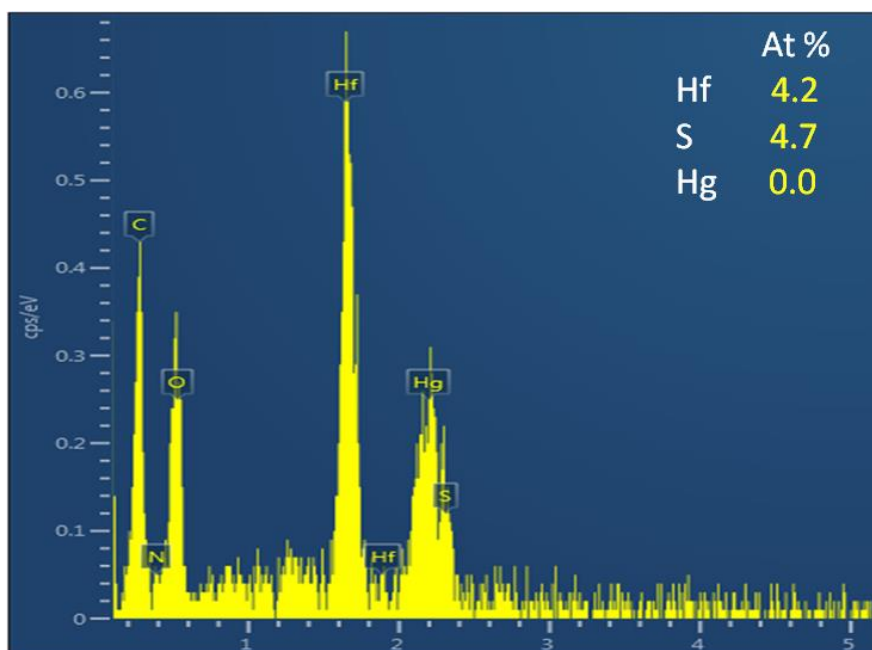

**Figure S63.** TEM-EDX spectrum of **Hf-UiO-66-NHCSNHCH<sub>3</sub>** after Hg<sup>2+</sup> sensing after through washing.

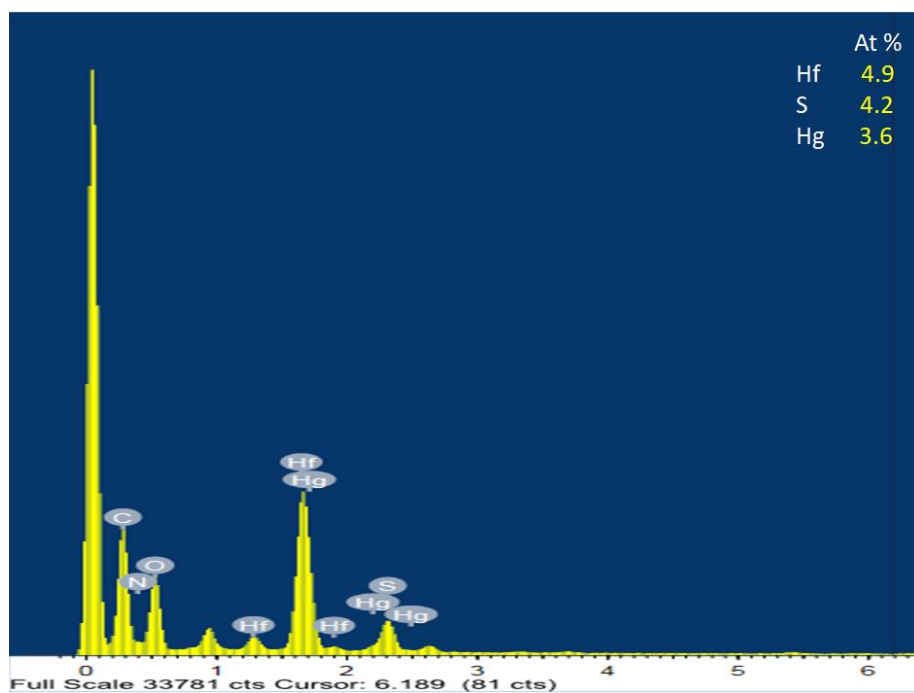

**Figure S64.** TEM-EDX spectrum of **Hf-UiO-66-NHCSNHCH<sub>3</sub>** after  $\text{Hg}^{2+}$  sensing and without through washing.

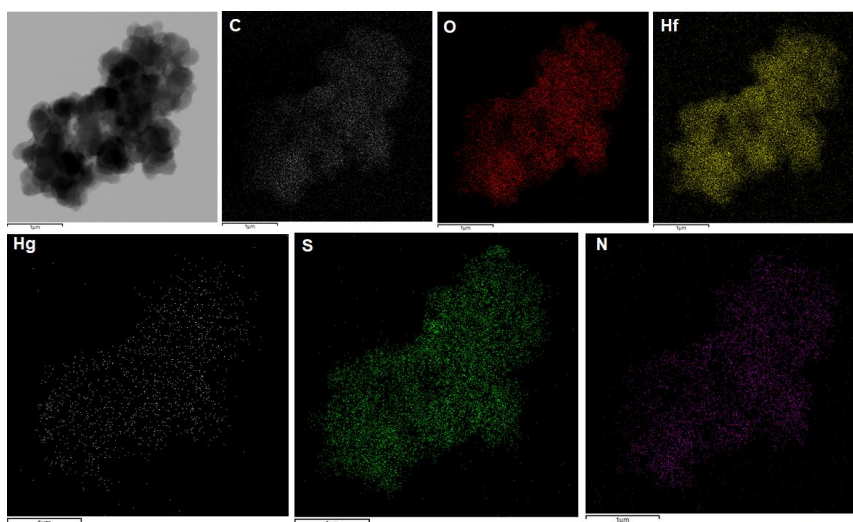

**Figure S65.** TEM-EDX mapping of **Hf-UiO-66-NHCSNHCH<sub>3</sub>** after  $\text{Hg}^{2+}$  sensing and without washing.

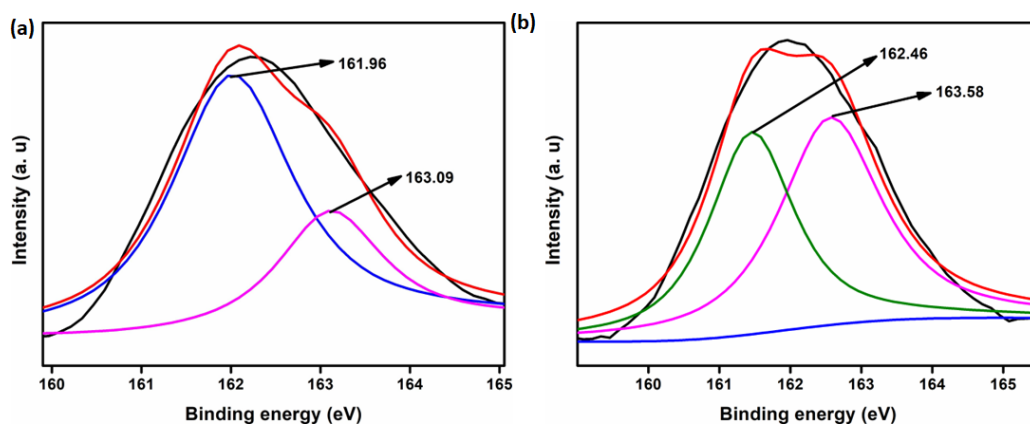

**Figure S66.** Fitted XPS spectra of S (2s) before (a) and after (b) treatment of  $\text{Hg}^{2+}$  with **Hf-UiO-66-NHCSNHCH<sub>3</sub>**.

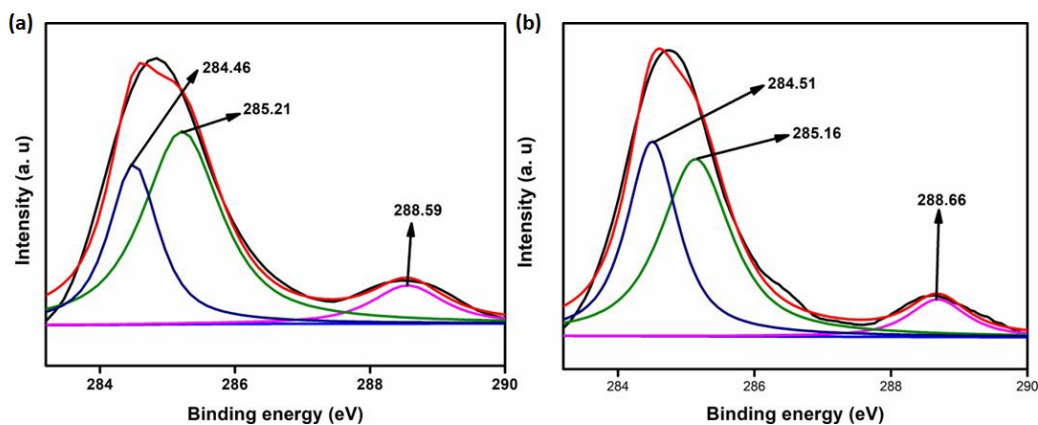

**Figure S67.** Fitted XPS spectra of C (1s) before (a) and after (b) treatment of  $\text{Hg}^{2+}$  with **Hf-UiO-66-NHCSNHCH<sub>3</sub>**.

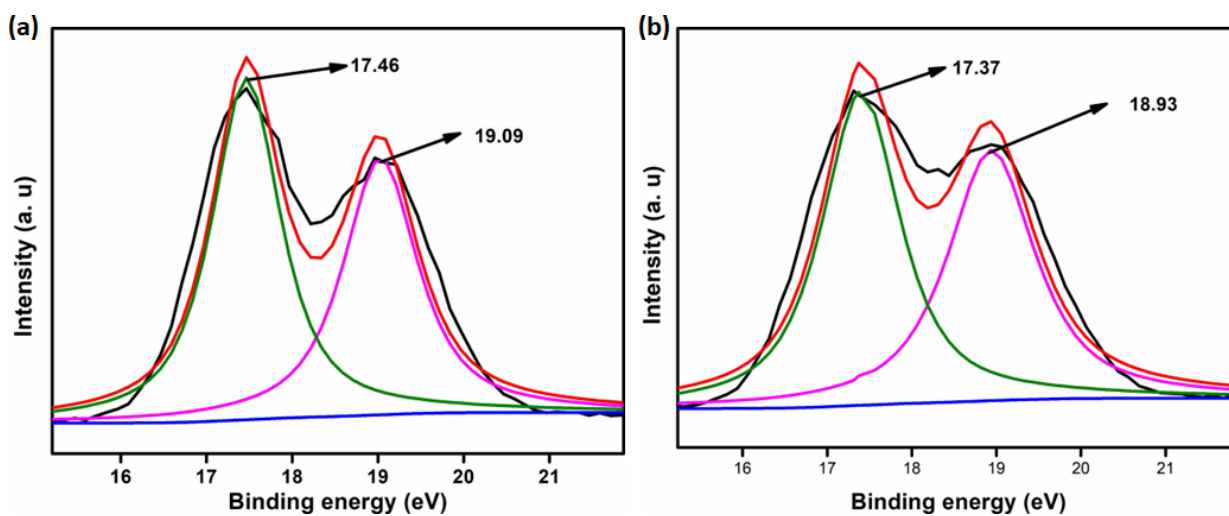

**Figure S68.** Fitted XPS spectra of Hf (4f) before (a) and after (b) treatment of  $\text{Hg}^{2+}$  with **Hf-UiO-66-NHCSNHCH<sub>3</sub>**.

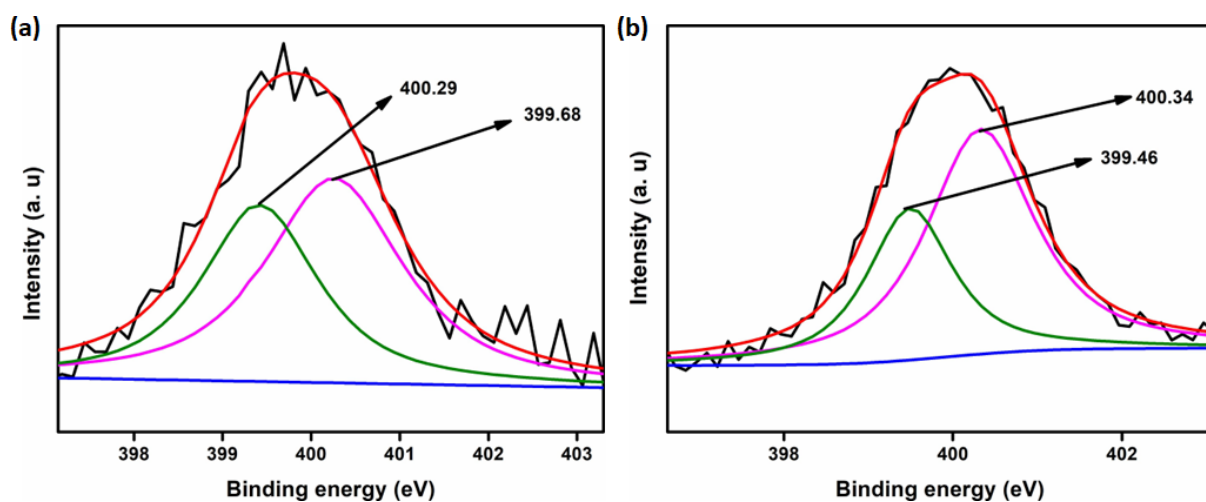

**Figure S69.** Fitted XPS spectra of N (1s) before (a) and after (b) treatment of  $\text{Hg}^{2+}$  with **Hf-UiO-66-NHCSNHCH<sub>3</sub>**.

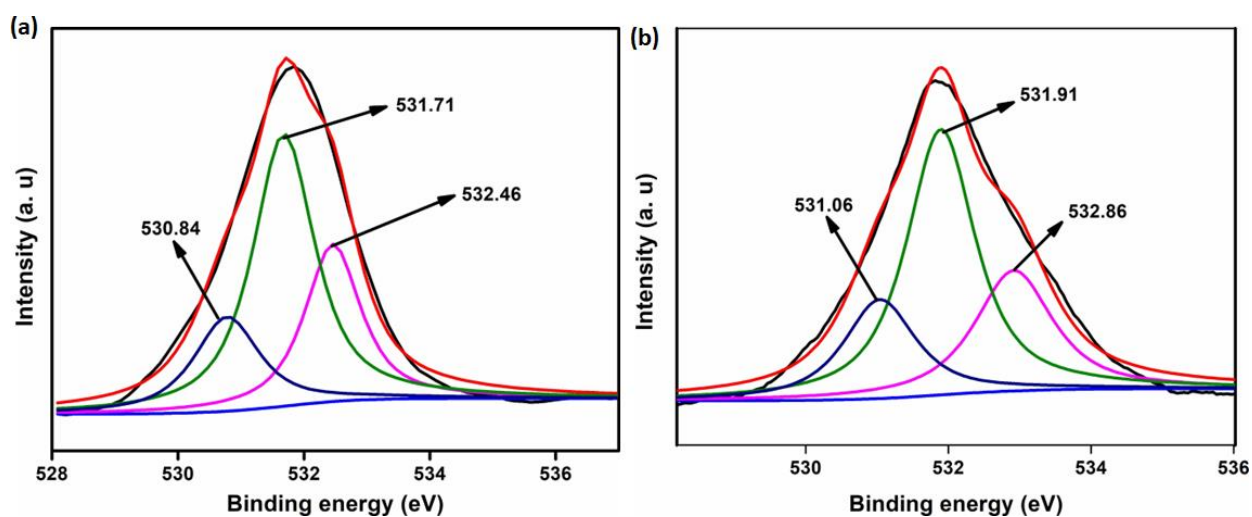

**Figure S70.** Fitted XPS spectra of O (1s) before (a) and after (b) treatment of  $\text{Hg}^{2+}$  with **Hf-UiO-66-NHCSNHCH<sub>3</sub>**.

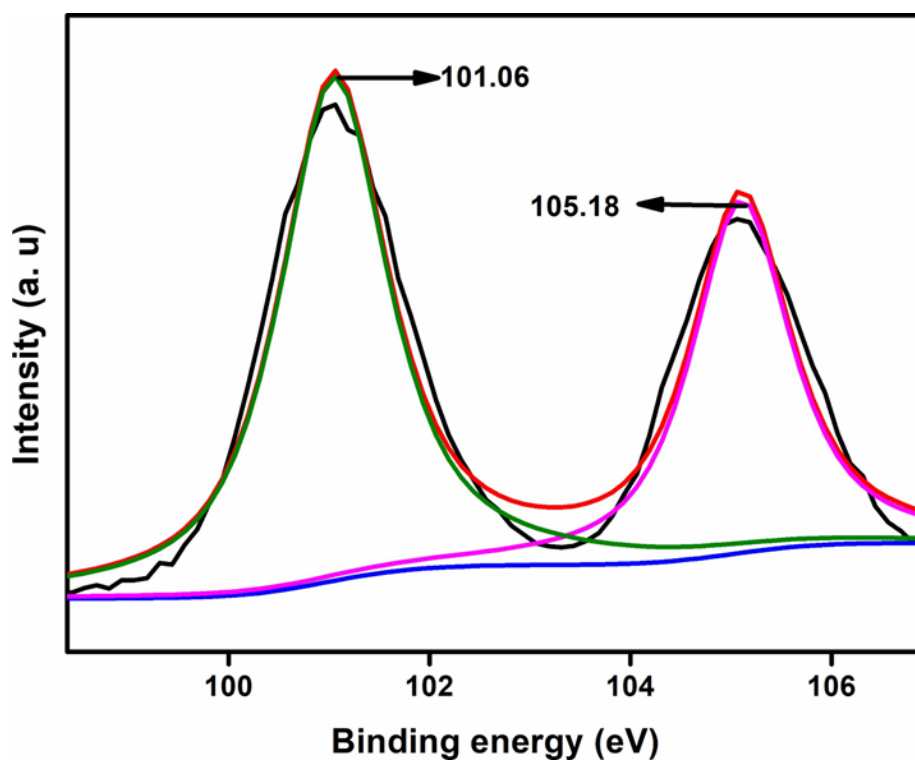

**Figure S71.** Fitted XPS spectra of Hg (4f) after treatment of  $\text{Hg}^{2+}$  with **Hf-UiO-66-NHCSNHCH<sub>3</sub>**.

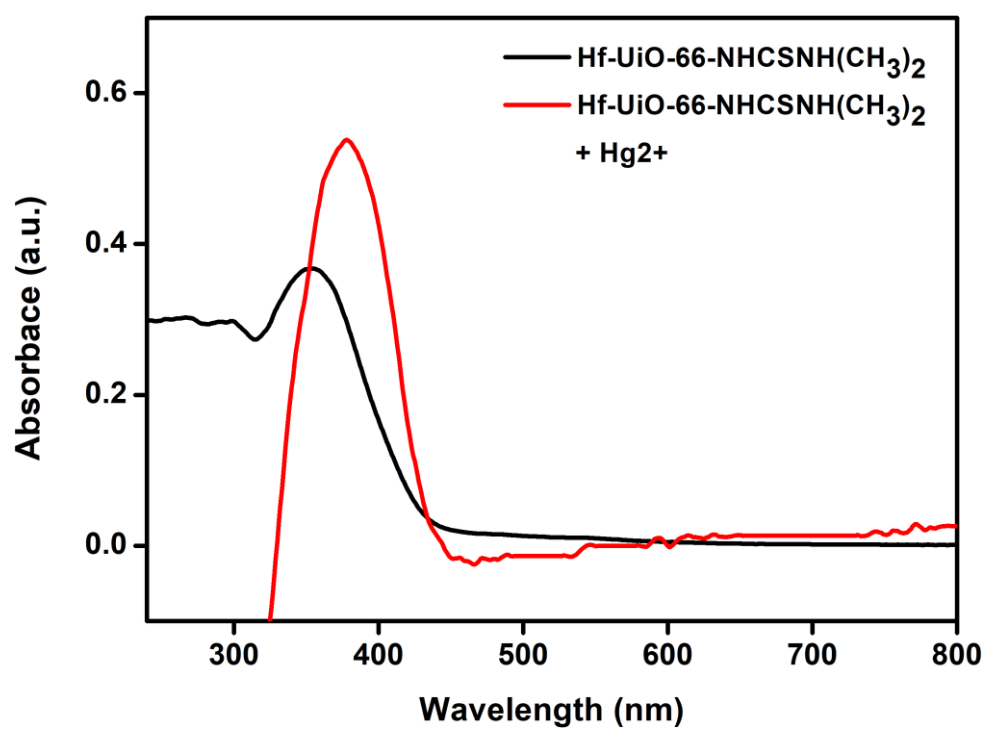

**Figure S72.** Solid-state UV-Vis spectrum of **Hf-UiO-66-NHCSNHCH<sub>3</sub>** before (black) and after (red) sensing of  $\text{Hg}^{2+}$ .

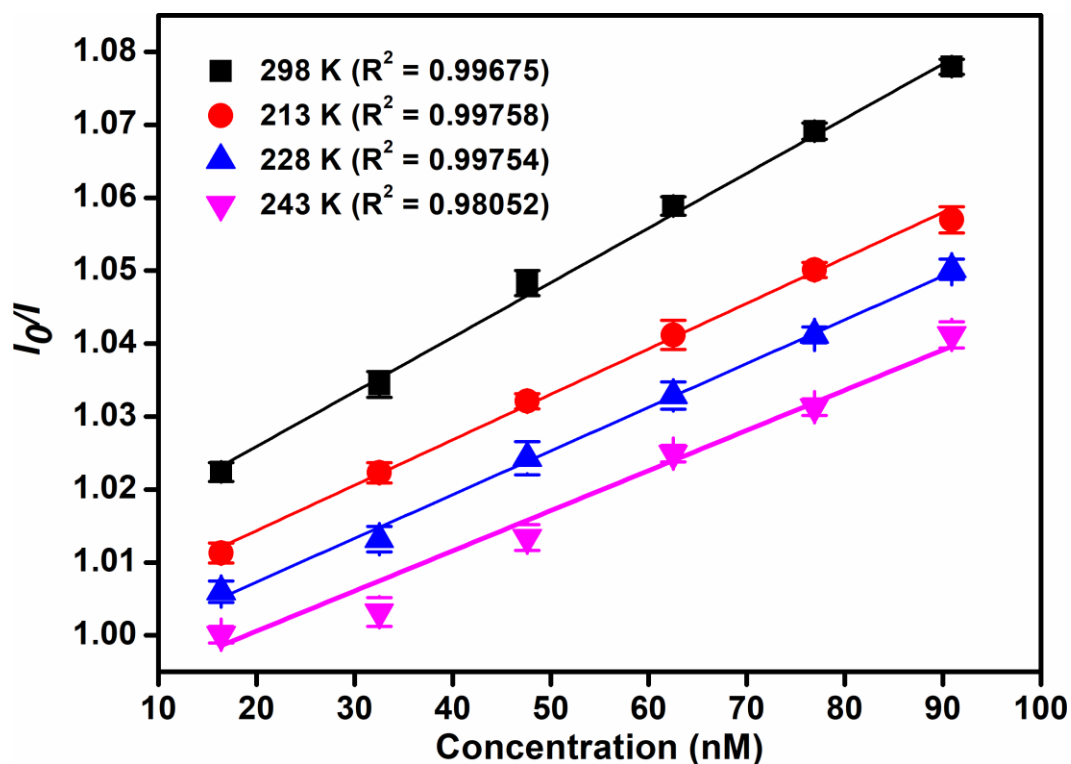

**Figure S73.** Stern-Volmer plots (with error bars) for fluorescence quenching of **Hf-UiO-66-NHCSNHCH<sub>3</sub>** by Hg<sup>2+</sup> at different temperatures.

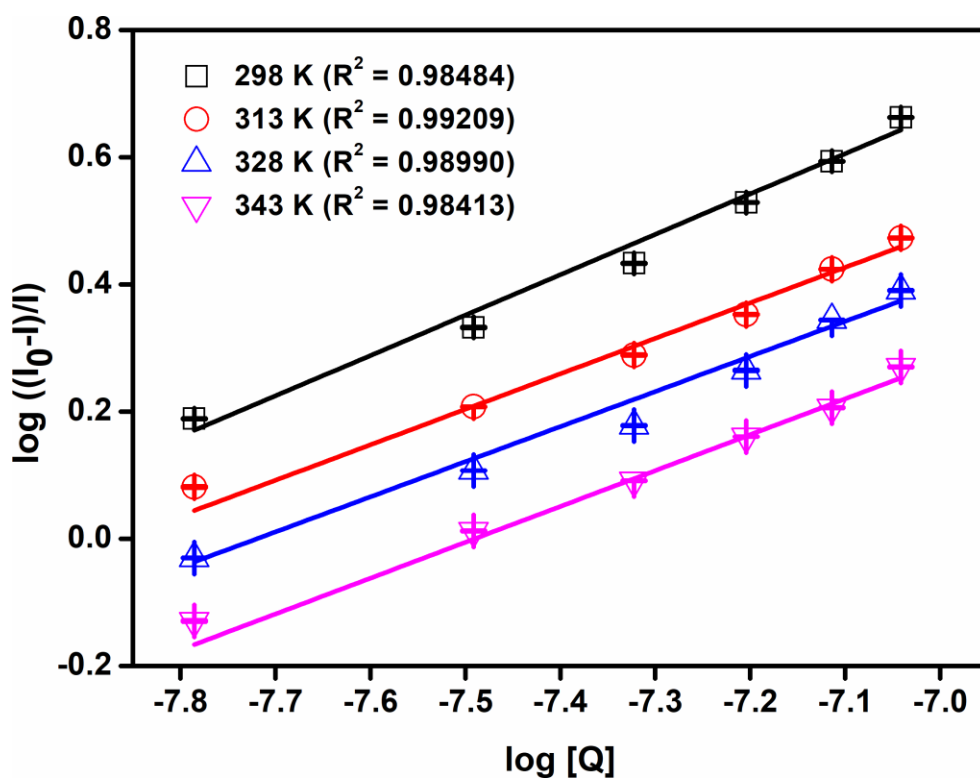

**Figure S74.** Modified Stern-Volmer plots (with error bars) between  $\log((I_0 - I)/I)$  and  $\log [Q]$ .



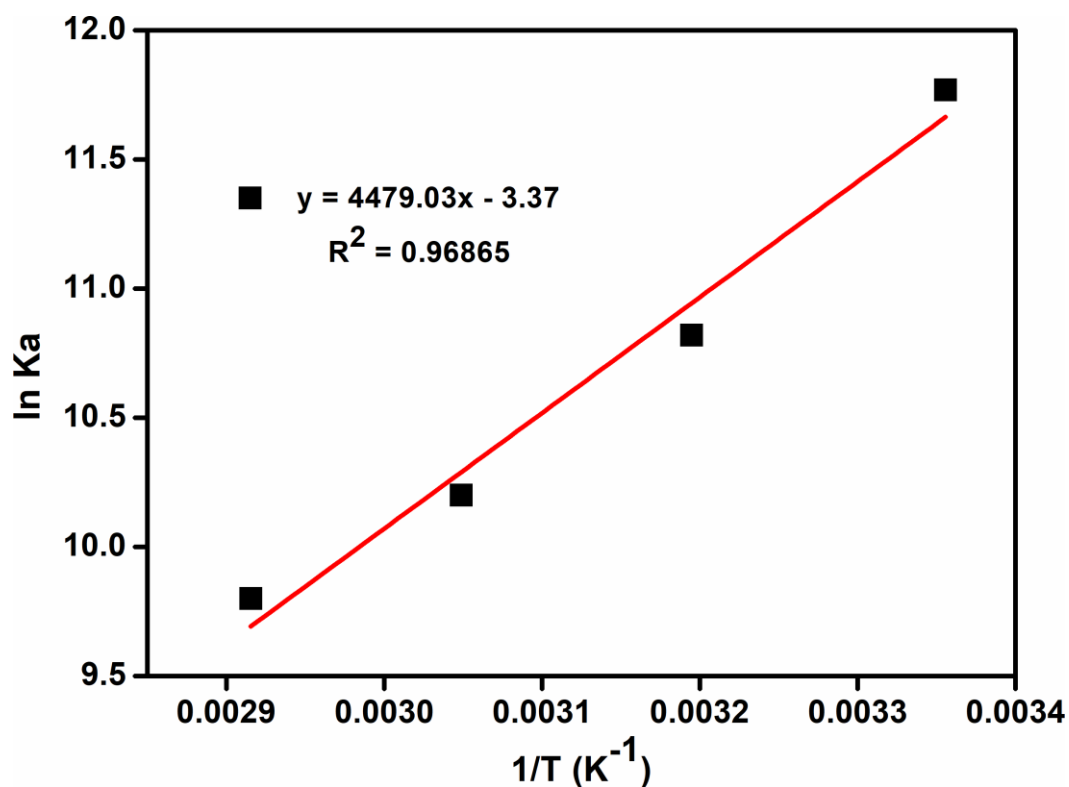

**Figure S75.** Van't Hoff plot for interaction of **Hf-UiO-66-NHCSNHCH<sub>3</sub>** with **Hg<sup>2+</sup>**.

**Table S5.** Comparison of the response time, detection limit and sensing media used for the reported fluorescent chemosensors of **NH<sub>2</sub>-NH<sub>2</sub>** in the literature.

| Sl. No. | Sensor Material                                                                                                                       | Type of Material              | Sensing Medium | Mode of Detection | Detection Limit | Response Time | Ref. |
|---------|---------------------------------------------------------------------------------------------------------------------------------------|-------------------------------|----------------|-------------------|-----------------|---------------|------|
| 1       | [Zr <sub>6</sub> O <sub>4</sub> (OH) <sub>4</sub> (BDC-O-SO <sub>2</sub> -Ph-NO <sub>2</sub> ) <sub>6</sub> ]·11H <sub>2</sub> O·4DMF | MOF                           | water          | turn-on           | 52.6 nM         | 2 min         | 2    |
| 2       | Zr-UiO-66-(OCOCH <sub>3</sub> ) <sub>2</sub>                                                                                          | MOF                           | water          | turn-on           | 78.8 nM         | seconds       | 3    |
| 3       | UiO-66-phmd                                                                                                                           | MOF                           | HEPES buffer   | turn-on           | 0.87 μM         | 20 min        | 4    |
| 4       | BTI                                                                                                                                   | organic-molecule              | HEPES buffer   | turn-on           | 2.9 ppb         | 20 min        | 5    |
| 5       | HyP-1                                                                                                                                 | organic-molecule              | PBS buffer     | turn-on           | 0.035 ppb       | 1 h           | 6    |
| 6       | P1                                                                                                                                    | organic-molecule              | PRS buffer     | turn-on           | 1.79 nM         | 40 s          | 7    |
| 7       | BPB                                                                                                                                   | BODIPY-based organic molecule | HEPES buffer   | turn-off          | 1.87 μM         | -             | 8    |

|    |                                         |                                               |                                                 |                         |                              |           |           |
|----|-----------------------------------------|-----------------------------------------------|-------------------------------------------------|-------------------------|------------------------------|-----------|-----------|
| 8  | Naphsulf-O                              | Organic-molecule                              | PBS buffer                                      | turn-on                 | 22 nM                        | 40 min    | 9         |
| 9  | BBHC                                    | Organic-molecule                              | PBS buffer                                      | turn-on                 | 0.43 $\mu$ M                 | 1 min     | 10        |
| 10 | CFAc                                    | Organic-molecule                              | PBS buffer                                      | ratio-metric            | 0.0474 $\mu$ M               | -         | 11        |
| 11 | BI-E                                    | near-infrared fluorescent probe               | PBS buffer                                      | turn-on                 | 0.057 $\mu$ M                | 1 min     | 12        |
| 12 | NA-N <sub>2</sub> H <sub>4</sub>        | naphthalimide based organic molecule          | HEPES buffer                                    | ratio-metric            | 9.4 nM                       | 15 min    | 13        |
| 13 | TAPHP                                   | organic-molecule                              | HEPES buffer                                    | ratio-metric            | 0.3 $\mu$ M                  | 60 min    | 14        |
| 14 | AB-NDI                                  | organic-molecule                              | DMSO                                            | turn-on                 | -                            | -         | 15        |
| 15 | TNQ                                     | organic-molecule                              | PBS buffer                                      | ratio-metric            | -                            | -         | 16        |
| 16 | HBTM                                    | organic-molecule                              | PBS buffer                                      | turn-on                 | 29 $\mu$ M                   | 55 min    | 17        |
| 17 | NAC                                     | naphthalene based organic molecule            | HEPES buffer                                    | turn-on                 | 4.5 $\mu$ M                  | 4 min     | 18        |
| 18 | DPA                                     | organic-molecule                              | DMSO/ PBS buffer solution (4/6, v/v)            | turn-on                 | 1.9 nM                       | 8 min     | 19        |
| 19 | probe <b>1</b><br>probe <b>2</b>        | pyrene- and anthracene based organic molecule | HEPES buffer                                    | turn-on                 | 0.17 $\mu$ M<br>0.24 $\mu$ M | 3 min     | 20        |
| 20 | SF-Azo compounds                        | organic-molecule                              | CH <sub>3</sub> OH/H <sub>2</sub> O (v/v = 1:1) | turn-on                 | 2.33 mM                      | 18-42 min | 21        |
| 21 | levulinated coumarin <b>1</b> hydroxyl- | organic-molecule                              | acetate buffer                                  | turn-on                 | 2.46 $\mu$ M                 | 15 min    | 22        |
| 22 | Compound <b>6a</b>                      | organic-molecule                              | HEPES/ DMSO (1:1, v/v)                          | turn-on and ratiometric | 0.19 $\mu$ M                 | -         | 23        |
| 23 | NS-N <sub>2</sub> H <sub>4</sub>        | organic-molecule                              | PBS/ DMSO (v/v = 2/1)                           | turn-on                 | -                            | 240 min   | 24        |
| 24 | PBF                                     | organic-molecule                              | CH <sub>3</sub> CN–H <sub>2</sub> O (6: 4, v/v) | turn-on                 | 0.41 $\mu$ M                 | 1 min     | 25        |
| 25 | Hf-UiO-66-NHCSNHCH <sub>3</sub>         | MOF                                           | H <sub>2</sub> O                                | turn-on                 | 1.9 nM                       | 0.8 min   | this work |

**Table S6.** Comparison of the response time, detection limit and sensing media used for the reported chemosensors of Hg<sup>2+</sup> in the literature using fluorometric method.

| Sl. No. | Sensor Material                                           | Type of Material | Sensing Medium                           | Detection Limit (nM) | Response Time (min) | Ref. |
|---------|-----------------------------------------------------------|------------------|------------------------------------------|----------------------|---------------------|------|
| 1       | Thiosemicarbazone                                         | organic-molecule | 0.01 M acetic acid/sodium acetate buffer | 770                  | -                   | 26   |
| 2       | GT capped AgNPs                                           | nanoparticles    | water                                    | 0.037                | 0-60                | 27   |
| 3       | Azo Crown ether                                           | organic molecule | methanol                                 | 13900                | -                   | 28   |
| 4       | Rhodamine 6 G based                                       | Rh-complex       | THF: Water (8:2, v/v, pH = 7)            | 30.37                | -                   | 29   |
| 5       | Tetraphenyl ethylene based AIE probe                      | organic molecule | water                                    | 63                   | -                   | 30   |
| 6       | Squaraine based fluorescent probe                         | organic molecule | Ethanol: Water (20:80, v/v)              | 21.9                 | 3                   | 31   |
| 7       | Rhodamine appended terphenyl                              | organic molecule | THF                                      | 500                  | 30                  | 32   |
| 8       | Double naphthalene Schiff base                            | organic compound | DMSO                                     | 55.9                 | 80                  | 33   |
| 9       | 2-Hydroxy benzothiazole modified rhodol                   | organic compound | THF: HEPES (4:6, v/v)                    | 270                  | -                   | 34   |
| 10      | Nitrogen-doped carbon quantum dots                        | quantum dots     | water                                    | 230                  | 15                  | 35   |
| 11      | [Ni(3-bpd) <sub>2</sub> (NCS) <sub>2</sub> ] <sub>n</sub> | MOF              | water                                    | -                    | 120                 | 36   |
| 12      | [PCN-221]                                                 | MOF              | water                                    | 10                   | 1                   | 37   |
| 13      | [Cu(Dcbb)(Bpe)].Cl                                        | MOF              | HEPES buffer                             | 3.2 and 3.3          | 30                  | 38   |
| 14      | UiO-66@ Butyne                                            | MOF              | water                                    | 10.9                 | 3                   | 39   |

|    |                                                                                                                    |                  |                    |            |      |           |
|----|--------------------------------------------------------------------------------------------------------------------|------------------|--------------------|------------|------|-----------|
| 15 | $\text{Ln}(\text{TATAB})_4(\text{DMF})_4(\text{H}_2\text{O})(\text{MeOH})_{0.5}$                                   | MOF              | water              | 4.4        | -    | 40        |
| 16 | $\text{Eu}^{3+}/\text{CDs}@\text{MOF-253}$                                                                         | MOF              | water              | 47.88      | 3    | 41        |
| 17 | $[\text{Cu}(\text{Cdcbp})(\text{H}_2\text{O})_2 \cdot 2\text{H}_2\text{O}]_n$                                      | MOF              | water              | 2.3        | 2    | 42        |
| 18 | Al-MOF (TAM)                                                                                                       | MOF              | water              | 2.94       | 0.5  | 43        |
| 19 | $[\text{Cu}(\text{Cbdc})_2(\text{Dps})(\text{H}_2\text{O})_3] \cdot 6\text{H}_2\text{O}_n$                         | MOF              | HEPES buffer       | 2.6        | 10   | 44        |
| 20 | Cd-EDDA                                                                                                            | MOF              | water              | 2          | 0.25 | 45        |
| 21 | tetrahydrodibenzo phenanthridine derivatives                                                                       | organic compound | DMSO : THF = 1 : 1 | 0.91 0.041 | 1    | 46        |
| 22 | $[\text{Zn}(\text{L})(\text{BBI})(\text{H}_2\text{O})_2][\text{Cd}(\text{L})(\text{TPOM})_{0.75}] \cdot x\text{S}$ | MOF              | water              | -          |      | 47        |
| 33 | IITG-5a                                                                                                            | MOF              | water              | 5          | 1    | 48        |
| 34 | Hf-UiO-66-NHCSNHCH <sub>3</sub>                                                                                    | MOF              | H <sub>2</sub> O   | 4          | 0.16 | this work |

## References:

- (1) Jakobsen, S.; Gianolio, D.; Wragg, D. S.; Nilsen, M. H.; Emerich, H.; Bordiga, S.; Lamberti, C.; Olsbye, U.; Tilset, M.; Lillerud, K. P. Structural determination of a highly stable metal-organic framework with possible application to interim radioactive waste scavenging: Hf-UiO-66. *Phys. Rev. B* **2012**, *86*, 125429.
- (2) Ghosh, S.; Biswas, S. A functionalized UiO-66 metal-organic framework acting as a fluorescent based selective sensor of hydrazine in aqueous medium. *Microporous Mesoporous Mater.* **2022**, *329*, 111552.
- (3) Nandi, S.; SK, M.; Biswas, S. Rapid Switch-On Fluorescent Detection of Nanomolar Level Hydrazine in Water by a Diacetoxy Functionalized MOF: Application in Paper Strips and Environmental Samples. *Dalton Trans.* **2020**, *49*, 2830-2834.
- (4) SK, M.; Khan, M. R. U. Z.; Das, A.; Nandi, S.; Trivedi, V.; Biswas, S. A Phthalimide-functionalized UiO-66 Metal-organic Framework for the Fluorogenic Detection of Hydrazine in Live Cells. *Dalton Trans.* **2019**, *48*, 12615-12621.
- (5) Maji, R.; Mahapatra, A. K.; Maiti, K.; Mondal, S.; Ali, S. S.; Sahoo, P.; Mandal, S.; Uddin, M. R.; Goswami, S.; Quah, C. K.; et al. A Highly Sensitive Fluorescent Probe for Detection of Hydrazine in Gas and Solution Phases Based on the Gabriel mechanism and its Bioimaging. *RSC Adv.* **2016**, *6*, 70855-70862.

- (6) Jung, Y.; Ju, I. G.; Choe, Y. H.; Kim, Y.; Park, S.; Hyun, Y.-M.; Oh, M. S.; D. Kim. Hydrazine Expose: The Next-Generation Fluorescent Probe. *ACS Sens.* **2019**, *4*, 441-449.
- (7) Shweta, S.; Kumar, A.; Asthana, S. K.; Prakash, A.; Roy, J. K.; Tiwari, I.; Upadhyay, K. K. A two-step Continuous Synthesis of  $\alpha$ -ketoamides and  $\alpha$ -amino Ketones from 2° Benzylic Alcohols Using Hydrogen Peroxide as an Economic and Benign Oxidant. *RSC Adv.* **2016**, *6*, 94959-99496.
- (8) Mahapatra, A. K.; Maji, R.; Maiti, K.; Manna, S. K.; Mondal, S.; Ali, S. S.; Manna, S.; Sahoo, P.; Mandal, S.; Uddin, M. R.; et al. A BODIPY/pyrene-based Chemodosimetric Fluorescent Chemosensor for Selective Sensing of Hydrazine in the Gas and Aqueous Solution State and its Imaging in Living Cells. *RSC Adv.* **2015**, *5*, 58228-58236.
- (9) Chen, W.; Liu, W.; Liu, X.-J.; Kuang, Y.-Q.; Yu, R.-Q.; J.-H.Jiang. A Novel Fluorescent Probe for Sensitive Detection and Imaging of Hydrazine in Living Cells. *Talanta* **2017**, *162*, 225-231.
- (10) Paul, S.; Nandi, R.; Ghoshal, K.; Bhattacharyya, M.; Maiti, D. K. A Smart Sensor for Rapid Detection of Lethal Hydrazine in Human Blood and Drinking Water. *New J. Chem.* **2019**, *43*, 3303-3330.
- (11) Zhang, Z.; Zhuang, Z.; Song, L. L.; Lin, X.; Zhang, S.; Zheng, G.; Zhan, F. A FRET-based Ratiometric Fluorescent Probe for Hydrazine and its Application in Living Cells. *J. Photochem. Photobiol. A* **2018**, *358*, 10-16.
- (12) Ma, J.; Fan, J.; Li, H.; Yao, Q.; Xia, J.; Wang, J.; Peng, X. Probing Hydrazine with a Near-infrared Fluorescent Chemodosimeter. *Dyes Pigm.* **2017**, *138*, 39-46.
- (13) Xia, X.; Zeng, F.; Zhang, P.; Lyu, J.; Huang, Y.; Wu, S. An ICT-based Ratiometric Fluorescent Probe for Hydrazine Detection and its Application in Living Cells and in Vivo. *Sens. Actuators B* **2017**, *227*, 411-418.
- (14) Luo, Z.; Liu, B.; Qin, T.; Zhu, K.; Zhao, C.; Pan, C.; Eang, L. Cyclization of Chalcone Enables Ratiometric Fluorescence Determination of Hydrazine with a High Selectivity. *Sens. Actuators B* **2018**, *263*, 229-236.
- (15) Zhou, D.; Wang, Y.; Jia, J.; Yu, W.; Qu, B.; Li, X.; Sun, X. H-Bonding and Charging Mediated Aggregation and Emission for Fluorescence Turn-on Detection of Hydrazine Hydrate. *Chem. Commun.* **2015**, *51*, 10656-10659.
- (16) Yu, S.; Wang, S.; Yu, H.; Feng, Y.; Zhang, S.; Zhu, M.; Yin, H.; Meng, X. A Ratiometric Two-photon Fluorescent Probe for Hydrazine and its Applications. *Sens. Actuators B* **2015**, *220*, 1338-1345.
- (17) Chen, Z.; Zhong, X.; Qu, W.; Shi, T.; Liu, H.; He, H.; Zhang, X.; Wang, S. A Highly Selective HBT-based "Turn-on" Fluorescent Probe for Hydrazine Detection and its Application. *Tetrahedron Lett.* **2017**, *58*, 2596-2601.
- (18) Goswami, S.; Das, A. K.; Saha, U.; Maity, S.; Khanra, K.; Bhattacharyya, N. Rapid Detection of Hydrazine in a Naphthol-fused Chromenyl Loop and its Effectiveness in Human Lung Cancer Cells: Tuning Remarkable Selectivity Via the Reaction Altered Pathway Supported by Theoretical Studies. *Org. Biomol. Chem.* **2015**, *13*, 2134-2139.
- (19) Zhang, Y.; Huang, Y.; Yue, Y.; Chao, J.; Huo, F.; Yin, C. A Compact Fluorescent Probe Based on o-phthalaldehyde for Ultrasensitive Detection of Hydrazine in Gas and Solution Phases. *Sens. Actuators B* **2018**, *273*, 944-950.
- (20) Roy, B.; Halder, S.; Guha, A.; Bandyopadhyay, S. Hydrazine-Selective Fluorescent Turn-On Probe Based on Ortho-Methoxy-Methyl-Ether (o-MOM) Assisted Retro-aza-Henry Type Reaction. *Anal. Chem.* **2017**, *89*, 10625-10636.
- (21) Shin, M. C.; Lee, Y.; Park, S. B.; Kim, E. Development of Azo-based Turn-on Chemical Array System for Hydrazine Detection with Fluorescence Pattern Analysis. *ACS Omega* **2019**, *4*, 14875-14885.

- (22) Choi, M. G.; Hwang, J.; Moon, J. O.; Sung, J.; Chang, S.-K. Hydrazine-selective Chromogenic and Fluorogenic Probe Based on Levulinated Coumarin. *Org. Lett.* **2011**, *13*, 5260-5263.
- (23) Purohit, D.; Sharma, C. P.; Raghuvanshi, A.; Jain, A.; S.Rawat, K.; M.Gupta, N.; Singh, J.; Sachdev, M.; Goel, A. First Dual Responsive “Turn-On” and “Ratiometric” AIEgen Probe for Selective Detection of Hydrazine Both in Solution and the Vapour Phase. *Chem. Eur.J.* **2019**, *25*, 4660-4664.
- (24) Wang, J.-Y.; Liu, Z.-R.; Ren, M.; Lin, W. 2-benzothiazoleacetonitrile Based Two-photon Fluorescent Probe for Hydrazine and its Bio-imaging and Environmental Applications. *Sci. Rep.* **2017**, *7*, 1-8.
- (25) Goswami, S.; Paul, S.; Manna, A. Fast and Ratiometric “Naked Eye” Detection of Hydrazine for Both Solid and Vapour Phase Sensing. *New J. Chem.* **2015**, *39*, 2300-2305.
- (26) Yu, Y.; Lin, L.-R.; Yang, K.-B.; Zhong, X.; Huang, R.-B.; Zheng, L.-S. p-Dimethylaminobenzaldehyde thiosemicarbazone: a simple novel selective and sensitive fluorescent sensor for mercury (II) in aqueous solution. *Talanta* **2006**, *69*, 103-106.
- (27) Mahajan, P. G.; Dige, N. C.; Vanjare, B. D.; Phull, A. R.; Kim, S. J.; Lee, K. H. Gallotannin mediated silver colloidal nanoparticles as multifunctional nano platform: Rapid colorimetric and turn-on fluorescent sensor for Hg<sup>2+</sup>, catalytic and in vitro anticancer activities. *J. Lumin.* **2019**, *206*, 624-633.
- (28) Hsieh, Y.-C.; Chir, J.-L.; Wu, H.-H.; Chang, P.-S.; Wu, A.-T. A sugar-aza-crown ether-based fluorescent sensor for Hg<sup>2+</sup> and Cu<sup>2+</sup>. *Carbohydr. Res.* **2009**, *344*, 2236-2239.
- (29) Vanjare, B. D.; Mahajan, P. G.; Ryoo, H.-I.; Dige, N. C.; Choi, N. G.; Han, Y.; Kim, S. J.; Kim, C.-H.; Lee, K. H. Novel rhodamine based chemosensor for detection of Hg<sup>2+</sup>: Nanomolar detection, real water sample analysis, and intracellular cell imaging. *Sens. Actuators B Chem.* **2021**, *330*, 129308.
- (30) Bhalla, V.; Tejpal, R.; Kumar, M. Rhodamine appended terphenyl: A reversible “off-on” fluorescent chemosensor for mercury ions. *Sensors Actuators, B Chem.* **2010**, *151* (1), 180-185.
- (31) Yuan, B.; Wang, D.-X.; Zhu, L.-N.; Lan, Y.-L.; Cheng, M.; Zhang, L.-M.; Chu, J.-Q.; Li, X.-Z.; Kong, D.-M. Dinuclear Hg II tetracarbene complex-triggered aggregation-induced emission for rapid and selective sensing of Hg<sup>2+</sup> and organomercury species. *Chem. Sci.* **2019**, *10*, 4220-4226.
- (32) Lin, S.-Y.; Zhu, H.-J.; Xu, W.-J.; Wang, G.-M.; Fu, N.-Y. A squaraine based fluorescent probe for mercury ion via coordination induced deaggregation signaling. *Chin. Chem. Lett.* **2014**, *25*, 1291-1295.
- (33) Wei, T.-b.; Gao, G.-y.; Qu, W.-j.; Shi, B.-b.; Lin, Q.; Yao, H.; Zhang, Y.-m. Selective fluorescent sensor for mercury (II) ion based on an easy to prepare double naphthalene Schiff base. *Sensors Actuators, B Chem.* **2014**, *199*, 142-147.
- (34) Chen, S.; Wang, W.; Yan, M.; Tu, Q.; Chen, S.-W.; Li, T.; Yuan, M.-S.; Wang, J. 2-Hydroxy benzothiazole modified rhodol: aggregation-induced emission and dual-channel fluorescence sensing of Hg<sup>2+</sup> and Ag<sup>+</sup> ions. *Sensors Actuators, B Chem.* **2018**, *255*, 2086-2094.
- (35) Zhang, R.; Chen, W. Nitrogen-doped carbon quantum dots: Facile synthesis and application as a “turn-off” fluorescent probe for detection of Hg<sup>2+</sup> ions. *Biosens. Bioelectron.* **2014**, *55*, 83-90.
- (36) Halder, S.; Mondal, J.; Ortega-Castro, J.; Frontera, A.; Roy, P. A Ni-based MOF for selective detection and removal of Hg<sup>2+</sup> in aqueous medium: a facile strategy. *Dalton Trans.* **2017**, *46*, 1943-1950.
- (37) Moradi, E.; Rahimi, R.; Safarifard, V. Porphyrinic zirconium-based MOF with exposed pyrrole Lewis base site as an efficient fluorescence sensing for Hg<sup>2+</sup> ions, DMF small

molecule, and adsorption of Hg<sup>2+</sup> ions from water solution. *J. Solid State Chem. Sci.* **2020**, *286*, 121277.

(38) Hu, P.-P.; Liu, N.; Wu, K.-Y.; Zhai, L.-Y.; Xie, B.-P.; Sun, B.; Duan, W.-J.; Zhang, W.-H.; Chen, J.-X. Successive and specific detection of Hg<sup>2+</sup> and I<sup>-</sup> by a DNA@ MOF biosensor: experimental and simulation studies. *Inorg. Chem.* **2018**, *57*, 8382-8389.

(39) Samanta, P.; Desai, A. V.; Sharma, S.; Chandra, P.; Ghosh, S. K. Selective recognition of Hg<sup>2+</sup> ion in water by a functionalized metal–organic framework (MOF) based chemodosimeter. *Inorg. Chem.* **2018**, *57*, 2360-2364.

(40) Xia, T.; Song, T.; Zhang, G.; Cui, Y.; Yang, Y.; Wang, Z.; Qian, G. A terbium metal–organic framework for highly selective and sensitive luminescence sensing of Hg<sup>2+</sup> ions in aqueous solution. *Chem. Eur. J.* **2016**, *22* (51), 18429-18434.

(41) Xu, X.-Y.; Yan, B. Fabrication and application of a ratiometric and colorimetric fluorescent probe for Hg<sup>2+</sup> based on dual-emissive metal–organic framework hybrids with carbon dots and Eu<sup>3+</sup>. *J. Mater. Chem. C* **2016**, *4*, 1543-1549.

(42) Huang, N.-H.; Li, R.-T.; Fan, C.; Wu, K.-Y.; Zhang, Z.; Chen, J.-X. Rapid sequential detection of Hg<sup>2+</sup> and biothiols by a probe DNA—MOF hybrid sensory system. *J. Inorg. Biochem.* **2019**, *197*, 110690.

(43) Radwan, A.; El-Sewify, I. M.; Shahat, A.; Azzazy, H. M.; Khalil, M. M.; El-Shahat, M. F. Multiuse Al-MOF chemosensors for visual detection and removal of mercury ions in water and skin-whitening cosmetics. *ACS Sustainable Chem. Eng.* **2020**, *8* (40), 15097-15107.

(44) Huang, N.-H.; Liu, Y.; Li, R.-T.; Chen, J.; Hu, P.-P.; Young, D. J.; Chen, J.-X.; Zhang, W.-H. Sequential Ag<sup>+</sup>/biothiol and synchronous Ag<sup>+</sup>/Hg<sup>2+</sup> biosensing with zwitterionic Cu<sup>2+</sup>-based metal–organic frameworks. *Analyst* **2020**, *145*, 2779-2788.

(45) Wu, P.; Liu, Y.; Liu, Y.; Wang, J.; Li, Y.; Liu, W.; Wang, J. Cadmium-based metal–organic framework as a highly selective and sensitive ratiometric luminescent sensor for mercury (II). *Inorg. Chem.* **2015**, *54*, 11046-11048.

(46) Ponram, M.; Balijapalli, U.; Sambath, B.; Iyer, S. K.; Venkatachalapathy, B.; Cingaram, R.; Sundaramurthy, K. N. Development of paper-based chemosensor for the detection of mercury ions using mono-and tetra-sulfur bearing phenanthridines. *New J. Chem.* **2018**, (11), 8530-8536.

(47) Zhao, Y.; Xu, X.; Qiu, L.; Kang, X.; Wen, L.; Zhang, B. Metal–organic frameworks constructed from a new thiophene-functionalized dicarboxylate: luminescence sensing and pesticide removal. *ACS Appl. Mater. Interfaces* **2017**, *9* (17), 15164-15175.

(48) Yang, Y.; Ren, G.; Yang, W.; Qin, X.; Gu, D.; Liang, Z.; Guo, D.-Y.; Qinhe, P. A new MOF-based fluorescent sensor for the detection of nitrofurantoin antibiotics. *Polyhedron* **2021**, *194*, 114923.
